# Supplementary material for: Synthesis, biological activity and toxicity to zebrafish of benzamides substituted with pyrazole-linked 1,2,4-oxadiazole
Source: Royal Society of Chemistry journal article supplement (doi:10.1039/d2ra04327k), 2022-01-01
Supplement: d2ra04327k1.pdf [file d2ra04327k1.pdf]

# Supporting Information

## Synthesis Biological Activity and Toxicity to Zebrafish of Benzamides Substituted with Pyrazole-linked 1,2,4-Oxadiazole

Yingying Shao <sup>a</sup>, Minting Tu <sup>a</sup>, Sen Yang <sup>a</sup>, Yingying Wang <sup>a</sup>, Binlong Sun <sup>a</sup>, Jianjun Shi <sup>c</sup>, Chengxia Tan <sup>a,\*</sup> and  
Xuedong Wang <sup>b,\*</sup>

1. <sup>1</sup>H NMR spectra of **12a~12r**.....S1-S18
2. <sup>13</sup>C NMR spectra of **12a~12r**.....S19-S36
3. ESI-HRMS spectra of **12a~12r**.....S37-S54
4. Biological activity and toxicity assays

# 1. <sup>1</sup>H NMR spectra of 12a~12r

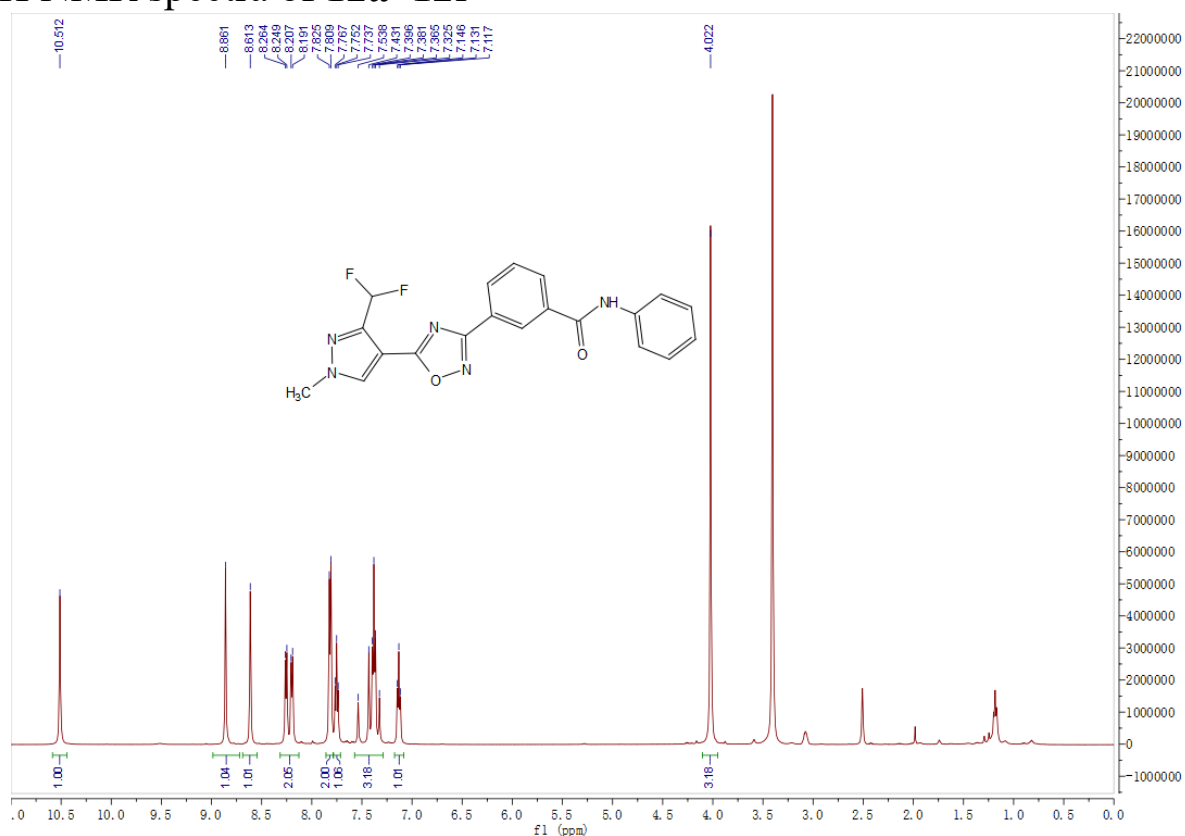

Figure S1 <sup>1</sup>H NMR spectra of 12a

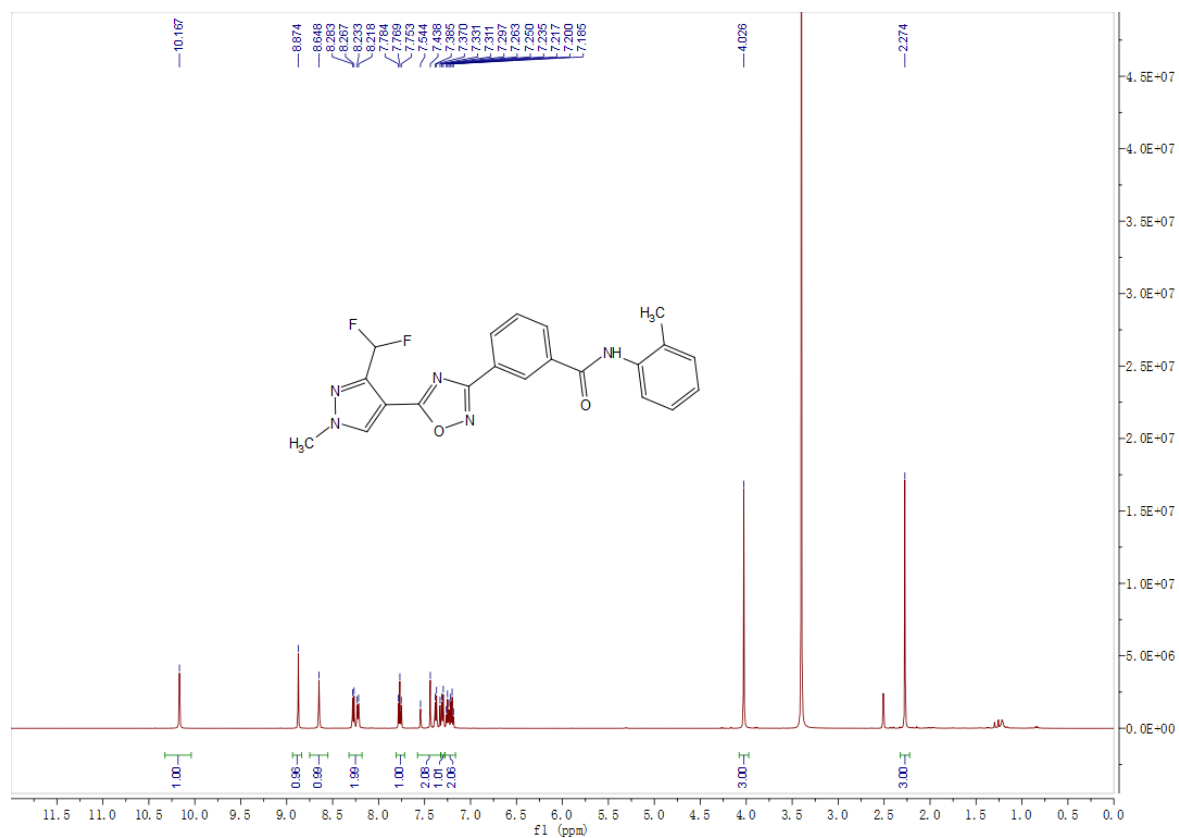

Figure S2 <sup>1</sup>H NMR spectra of 12b

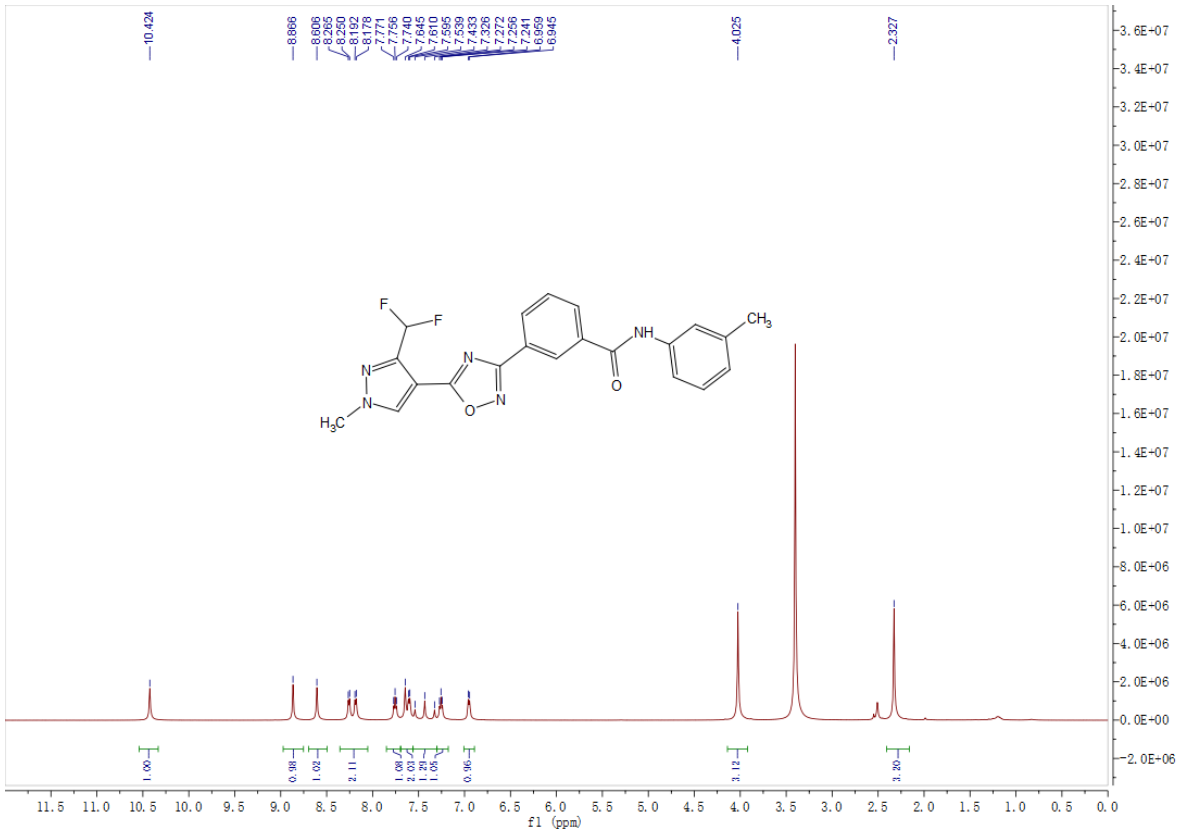

Figure S3  $^1\text{H}$  NMR spectra of 12c

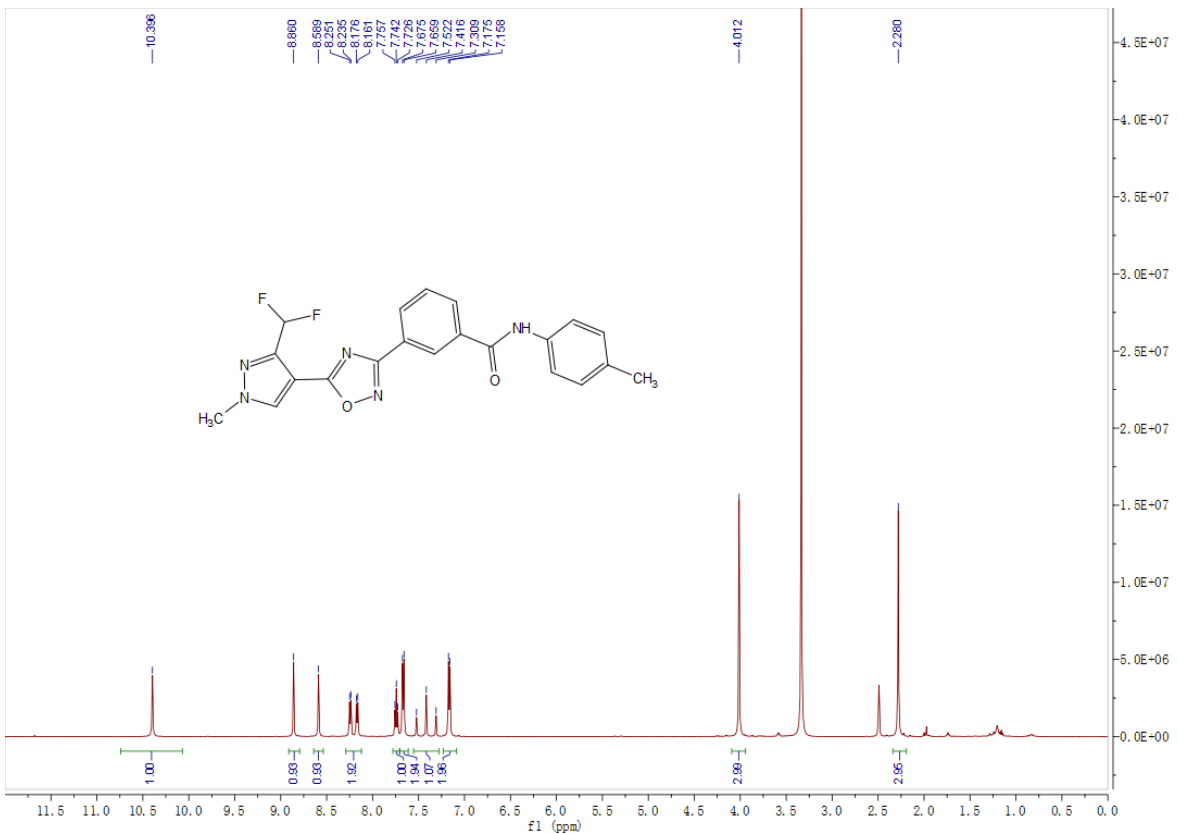

Figure S4  $^1\text{H}$  NMR spectra of 12d

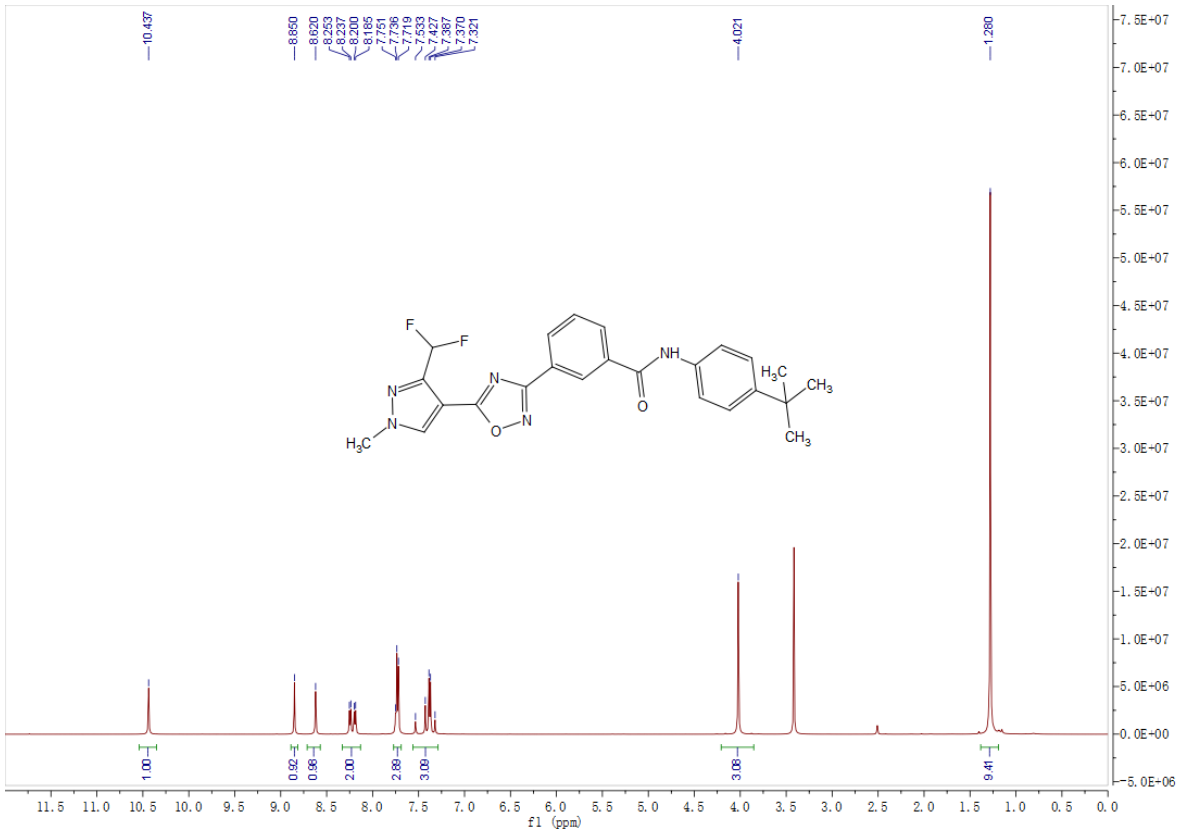

Figure S5  $^1\text{H}$  NMR spectra of 12e

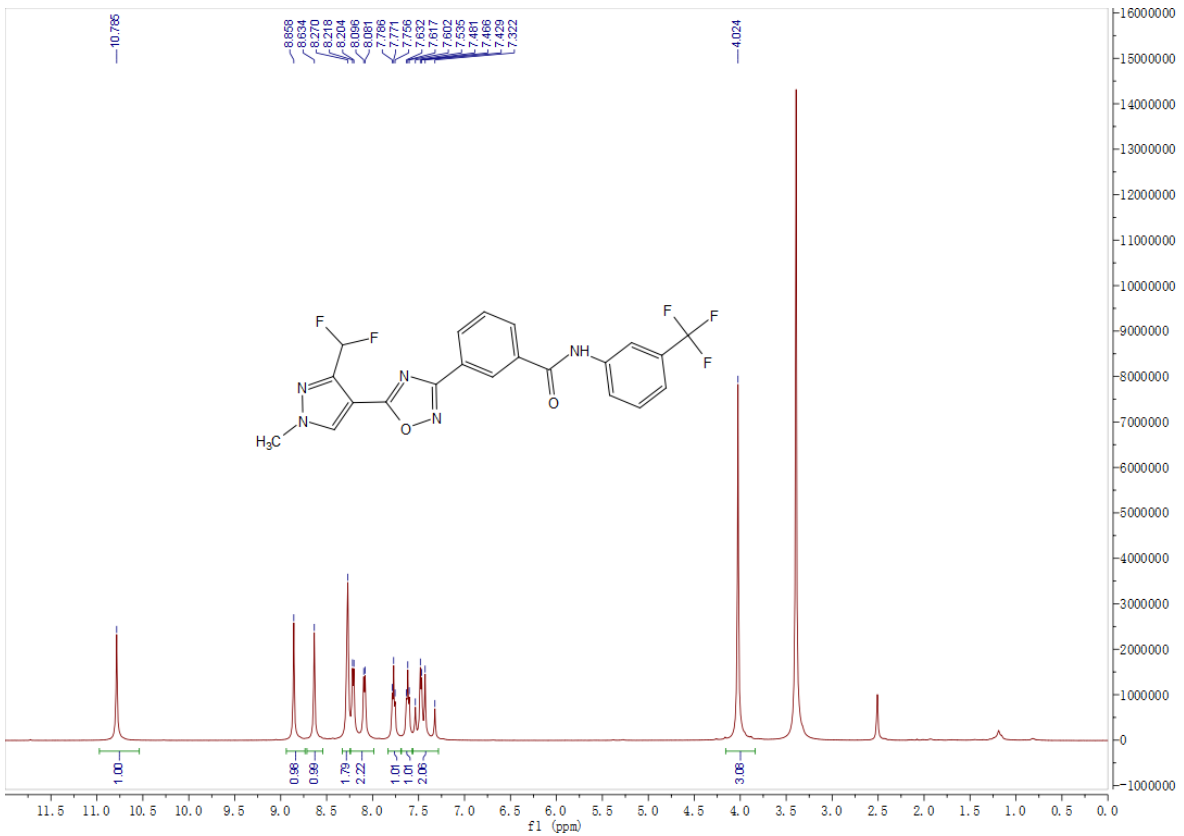

Figure S6  $^1\text{H}$  NMR spectra of 12f

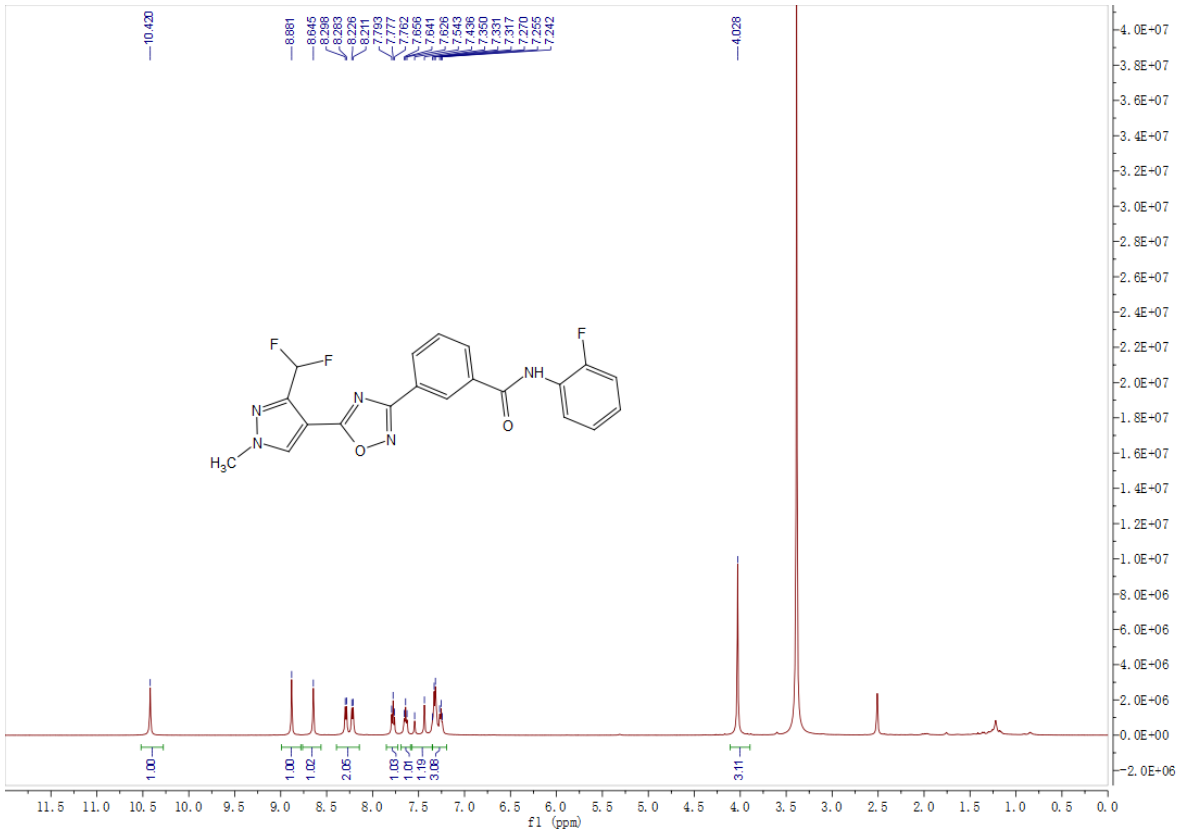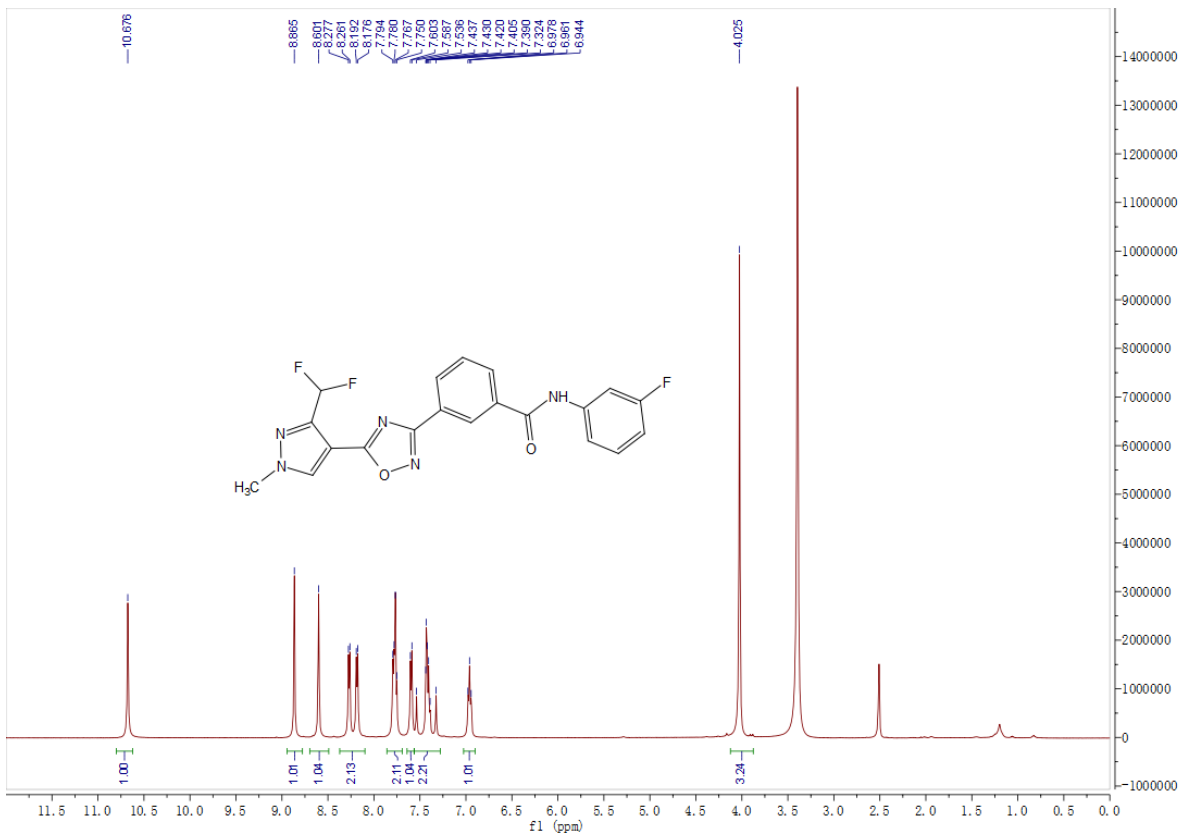

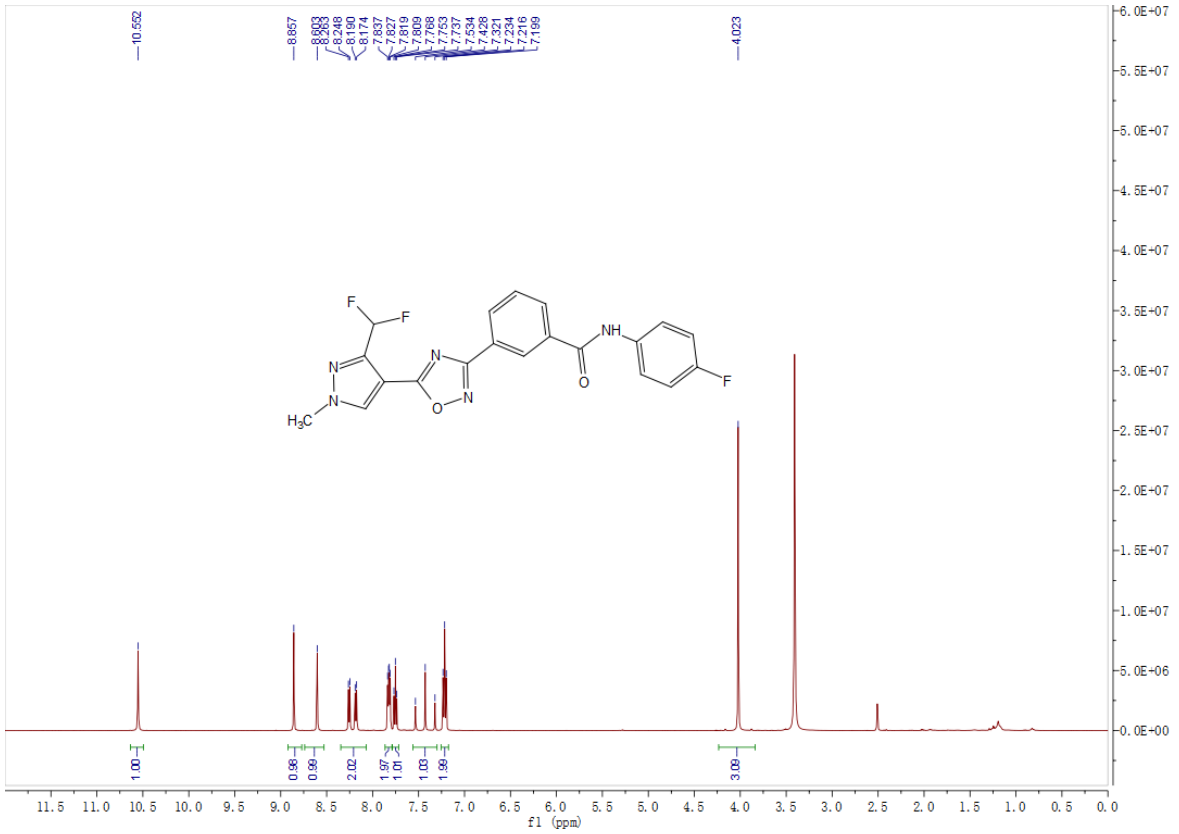

Figure S9  $^1\text{H}$  NMR spectra of **12i**

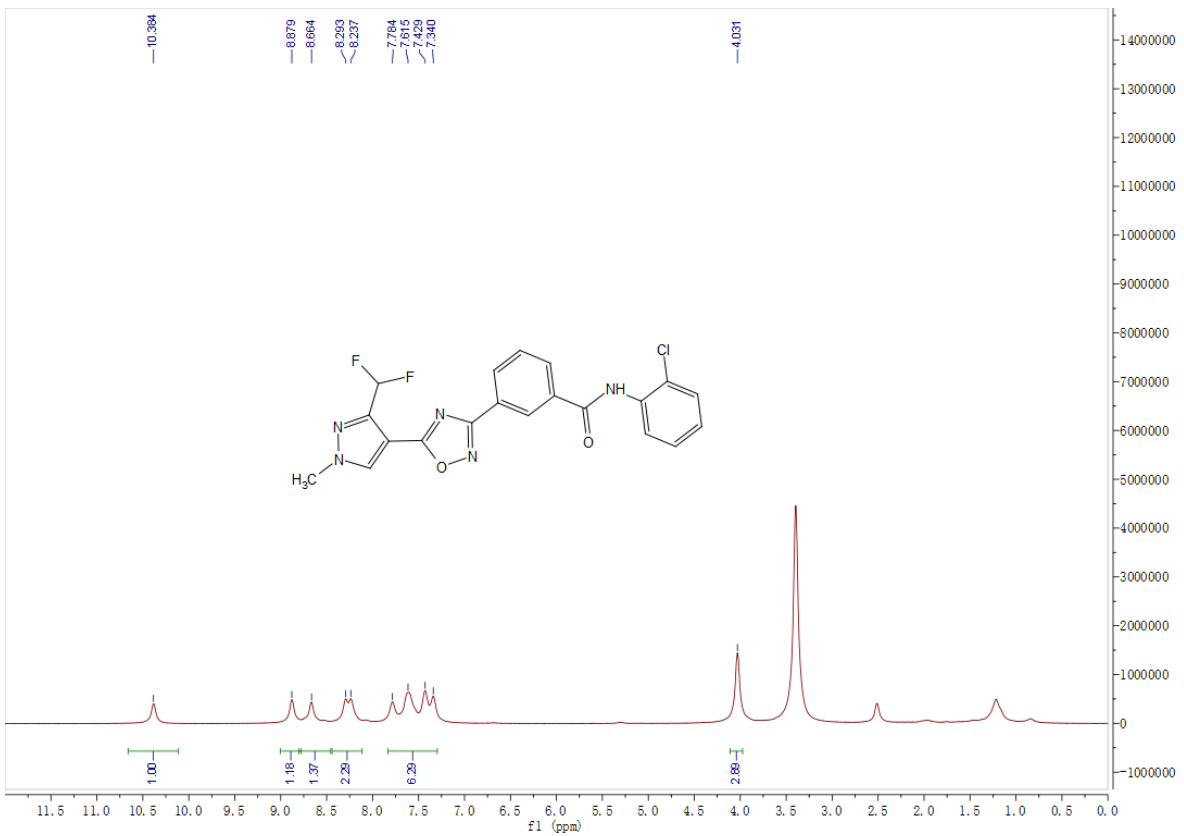

Figure S10  $^1\text{H}$  NMR spectra of **12j**

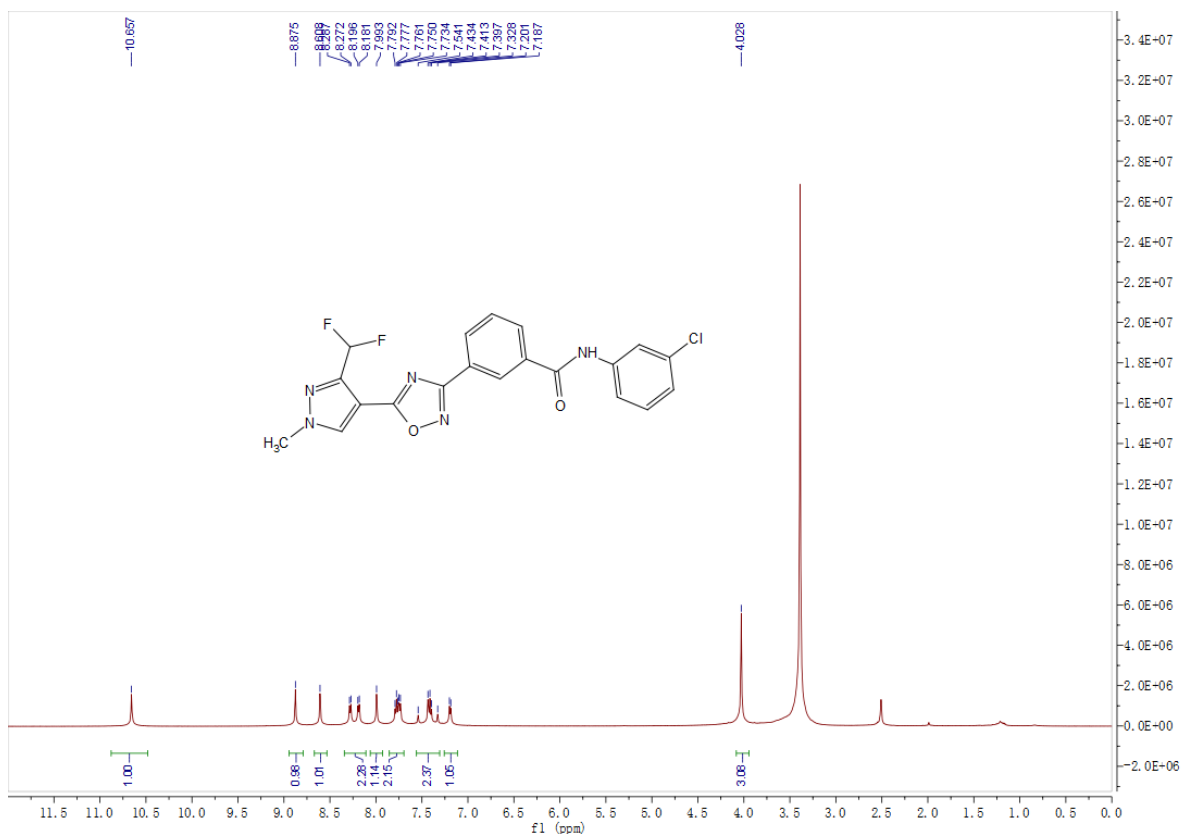

Figure S11  $^1\text{H}$  NMR spectra of 12k

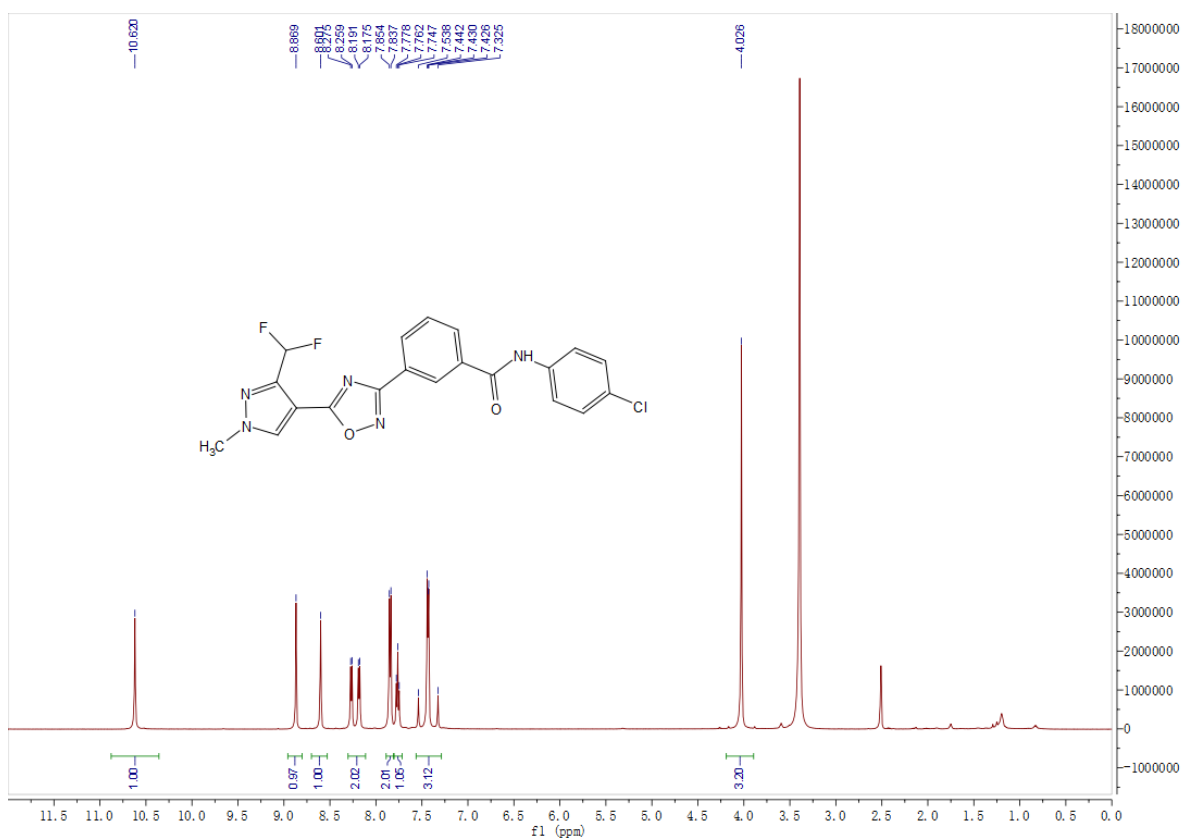

Figure S12  $^1\text{H}$  NMR spectra of 12l

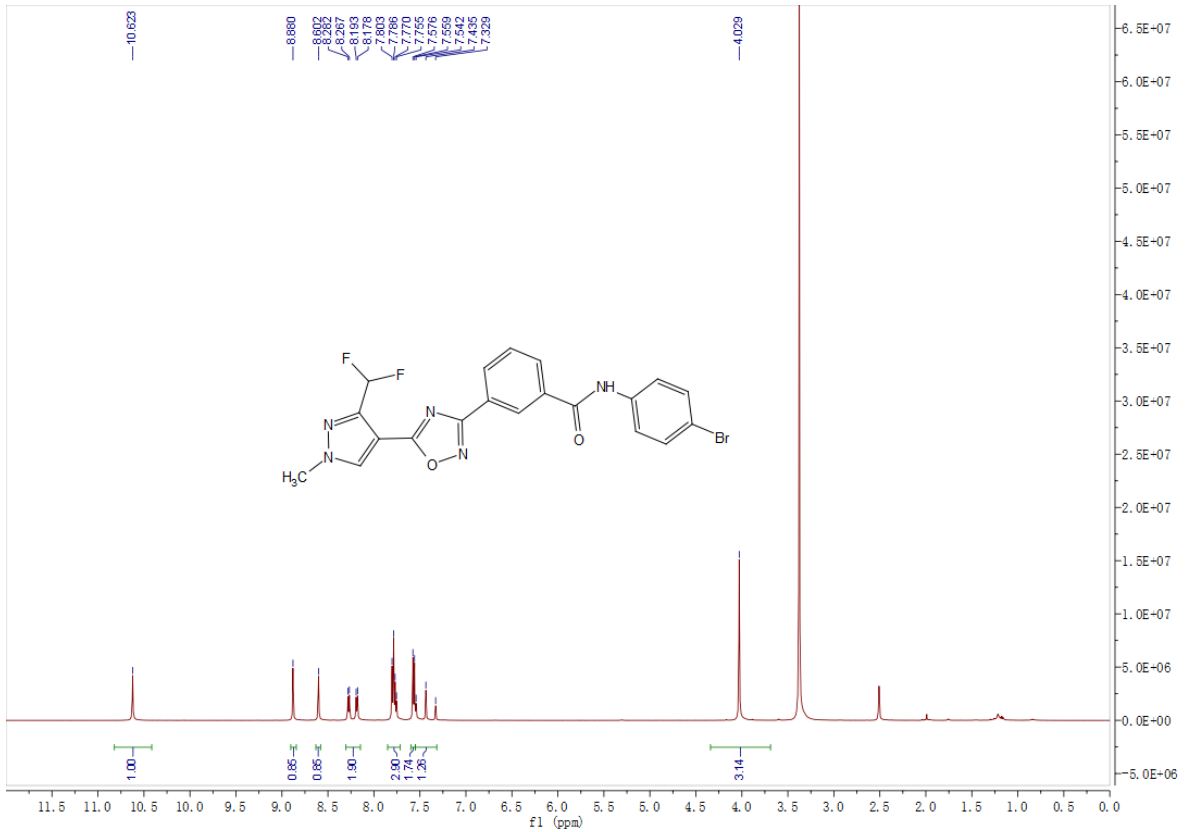

Figure S13 <sup>1</sup>H NMR spectra of 12m

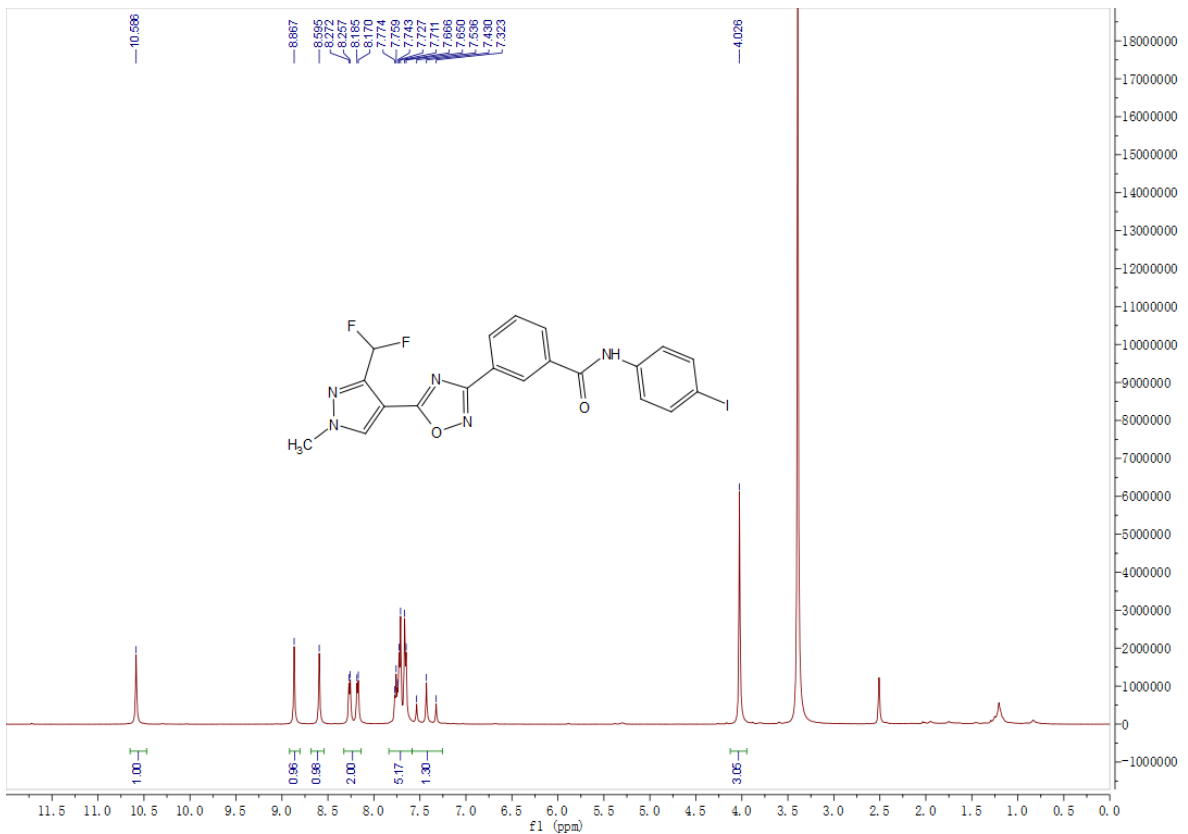

Figure S14 <sup>1</sup>H NMR spectra of 12n



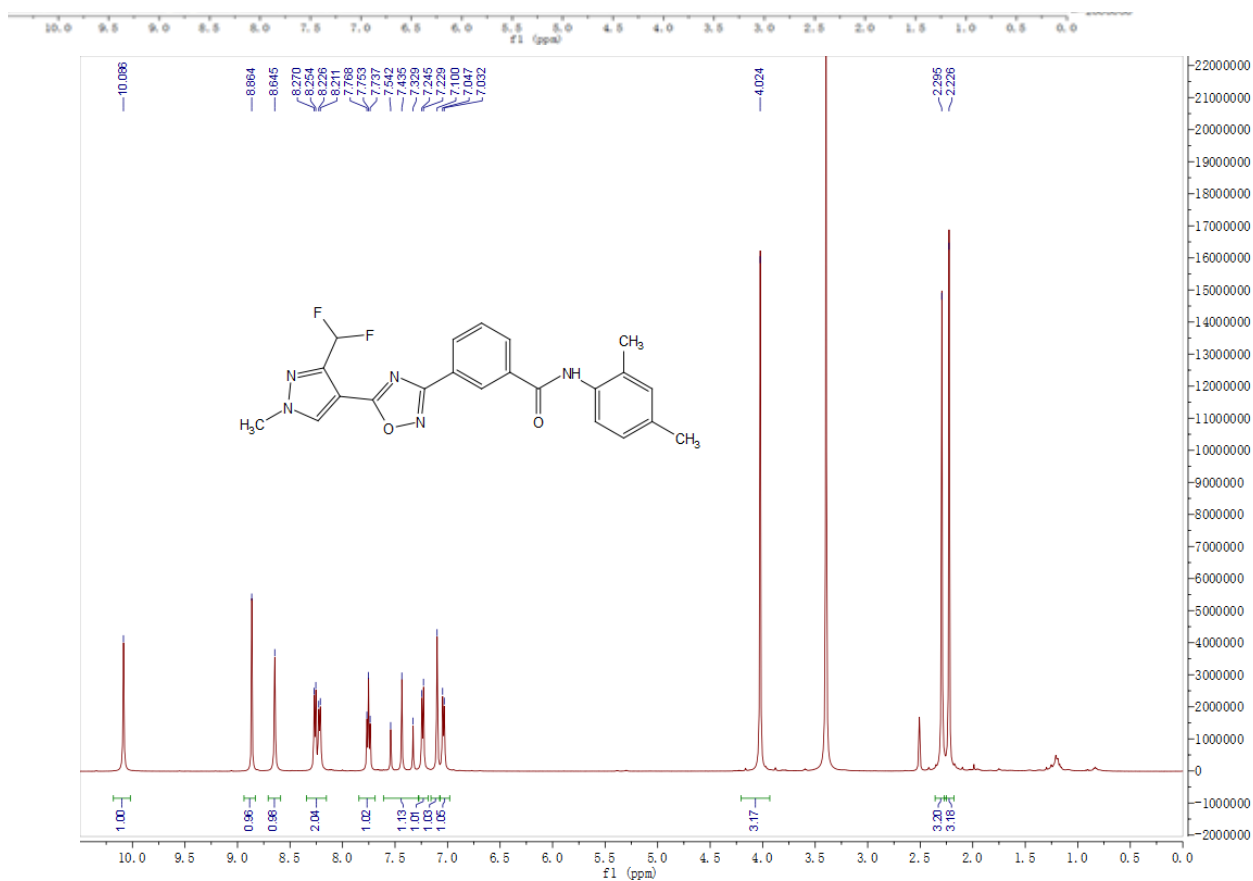

Figure S15  $^1\text{H}$  NMR spectra of 12o

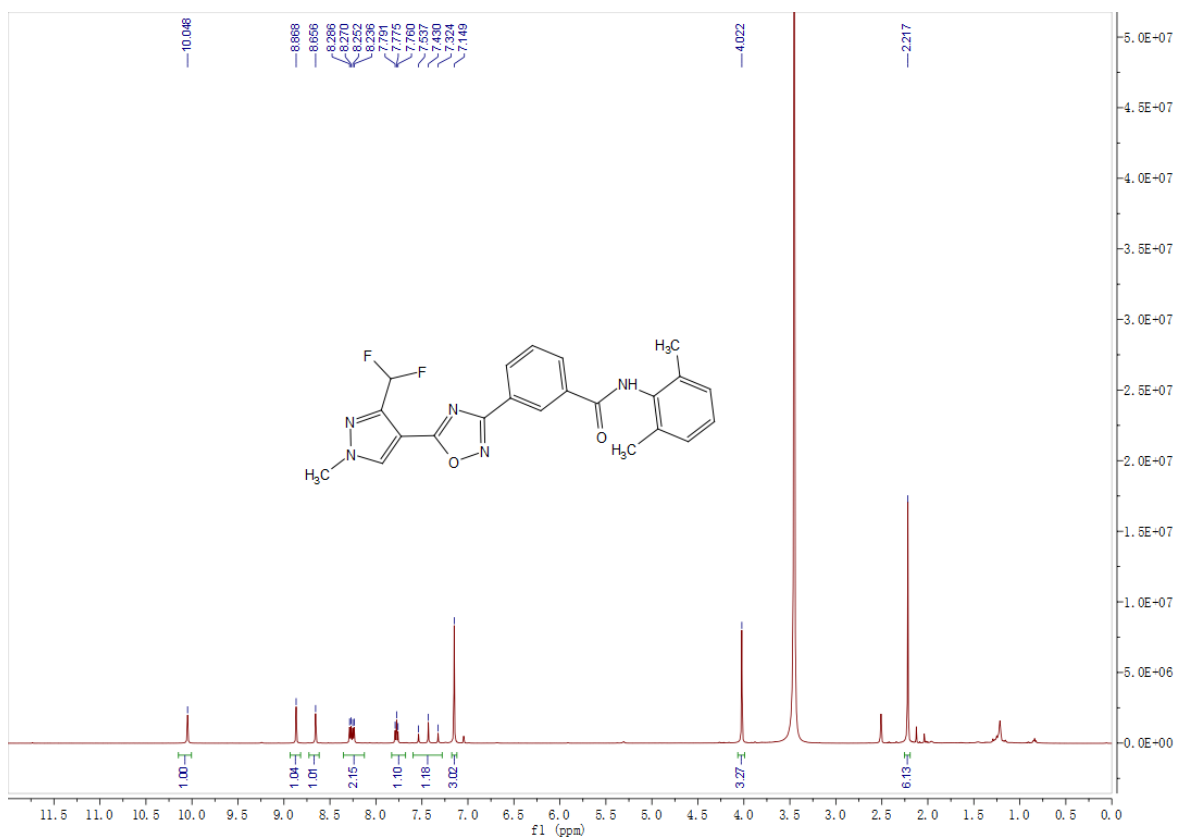

Figure S16  $^1\text{H}$  NMR spectra of 12p

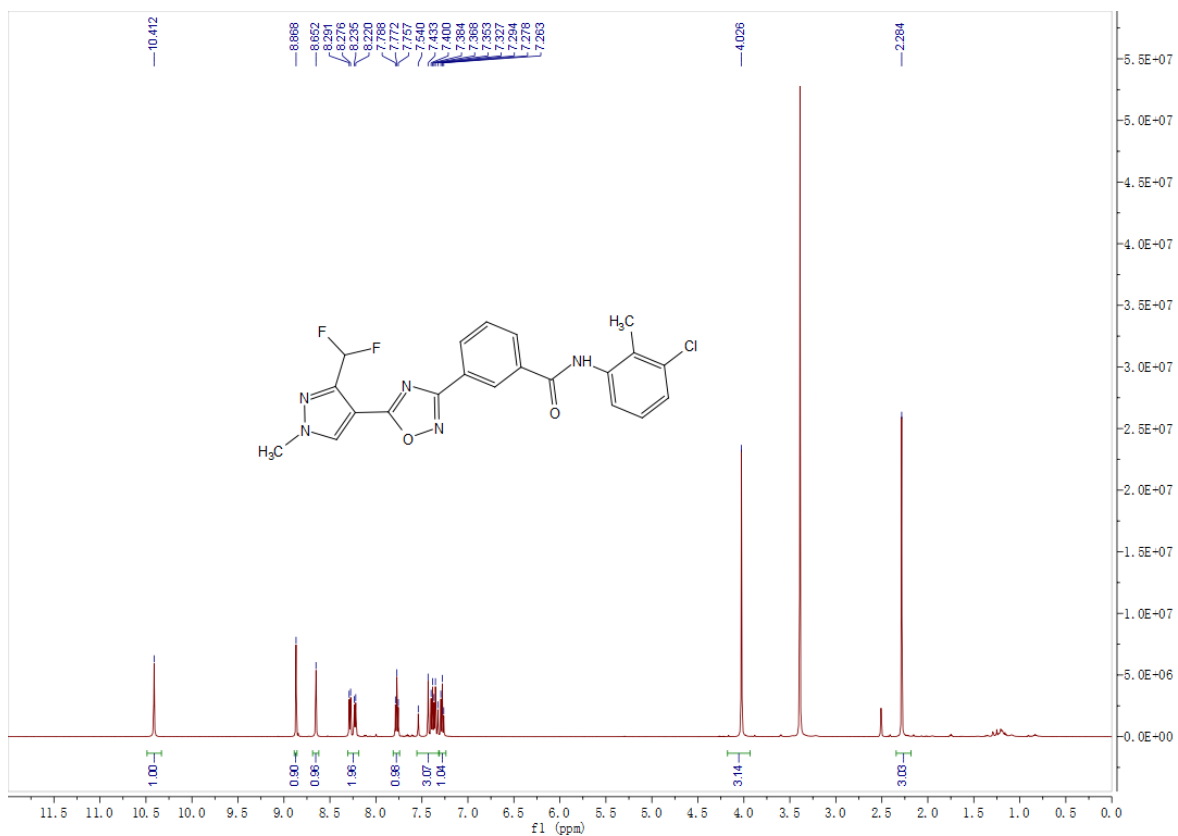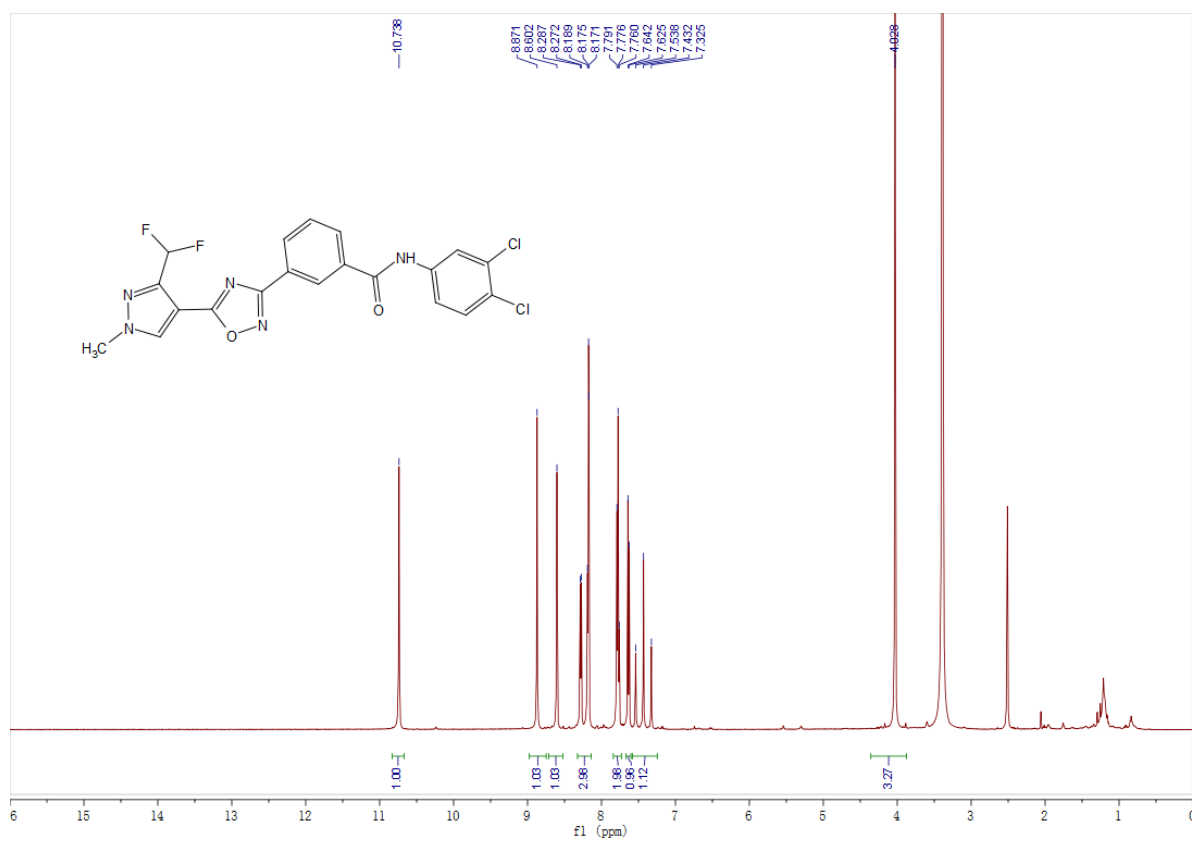



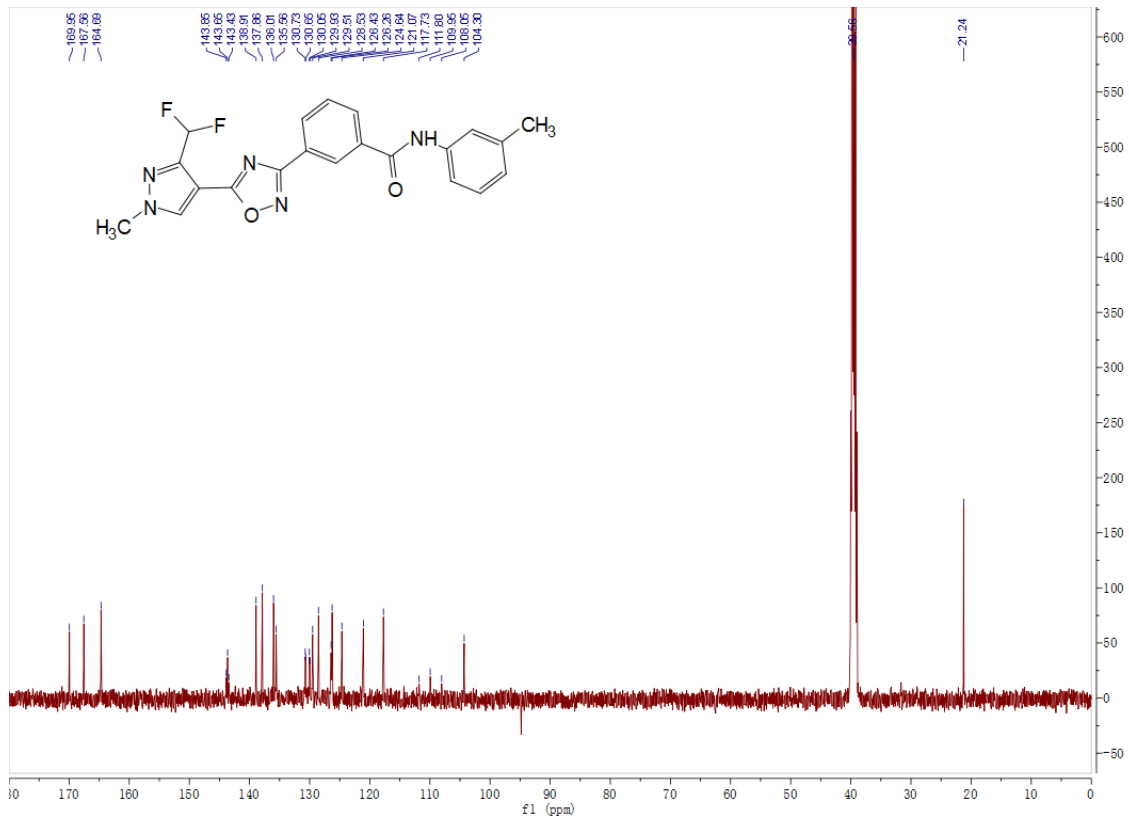

Figure S21 <sup>13</sup>C NMR spectra of 12c

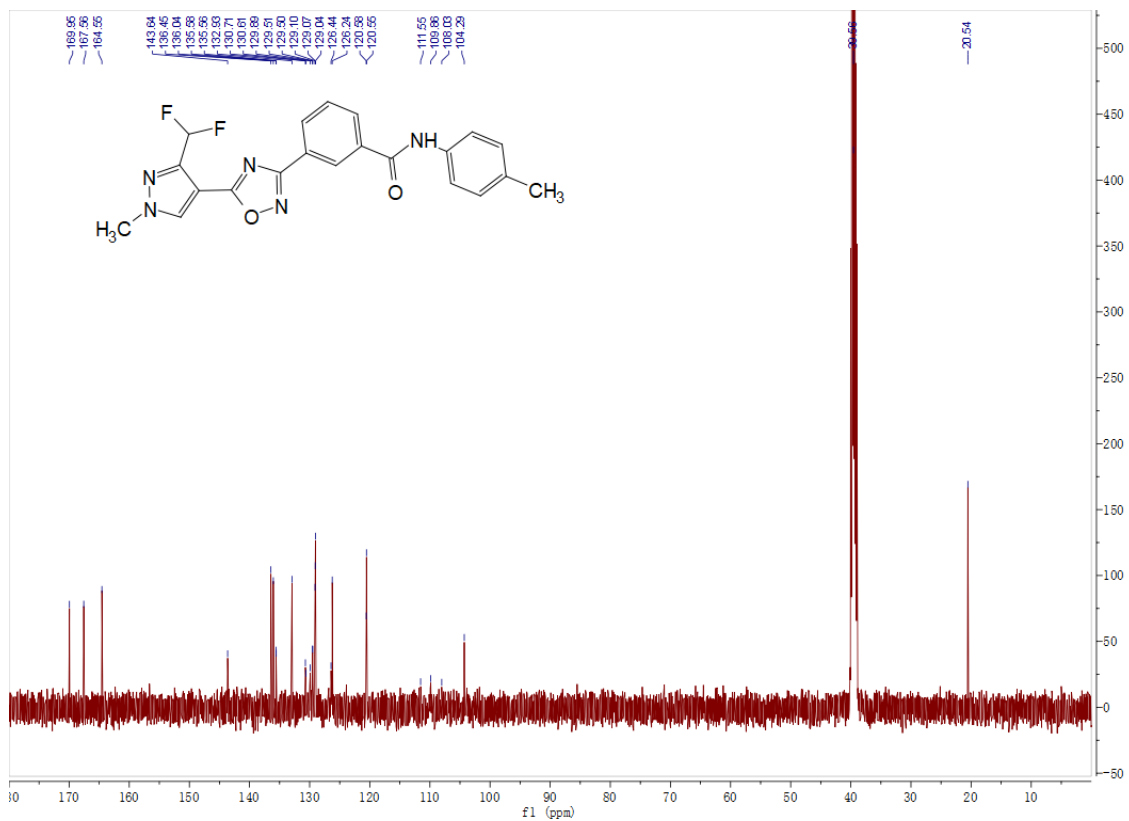

Figure S22 <sup>13</sup>C NMR spectra of 12d

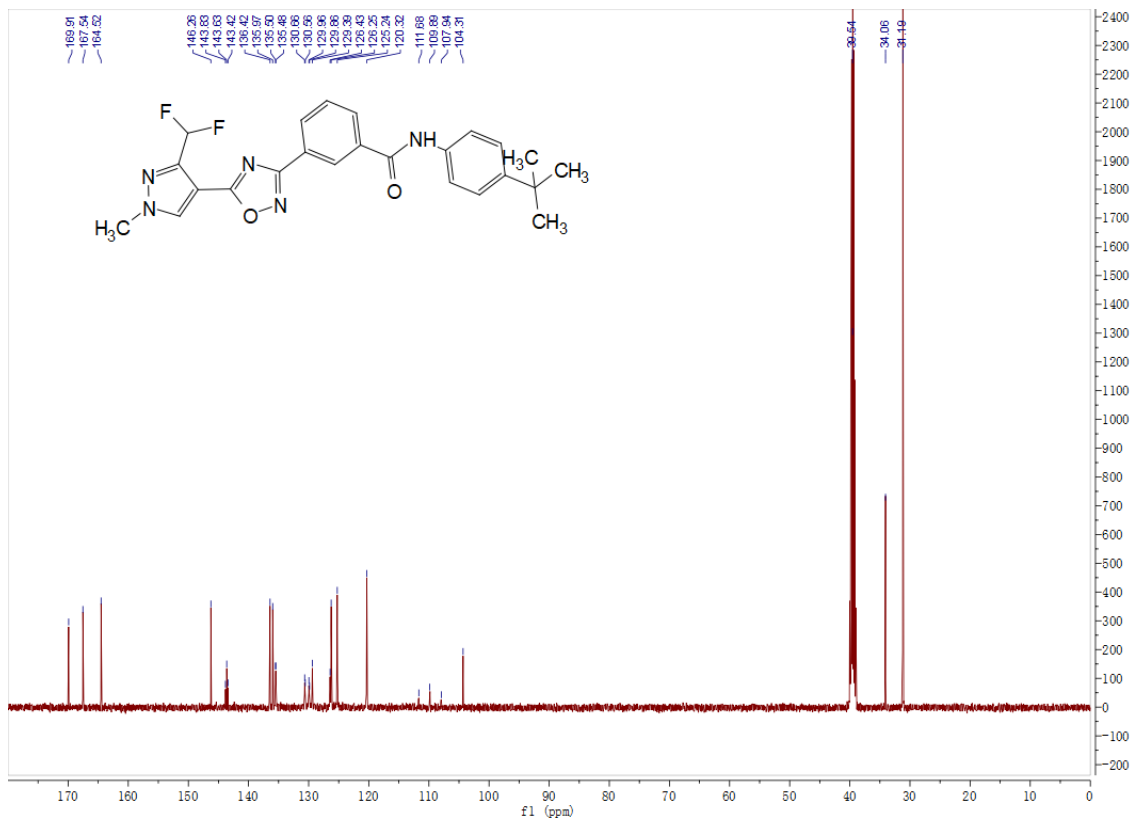

Figure S23 <sup>13</sup>C NMR spectra of 12e

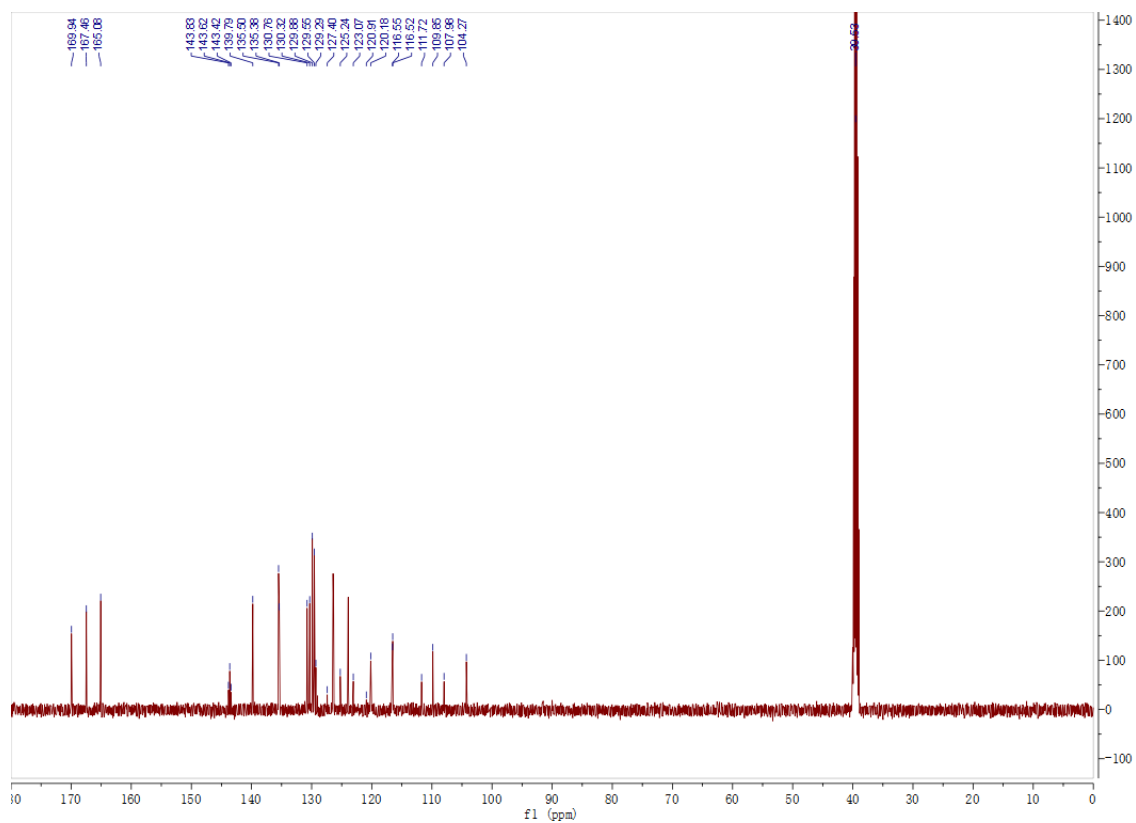

Figure S24 <sup>13</sup>C NMR spectra of 12f

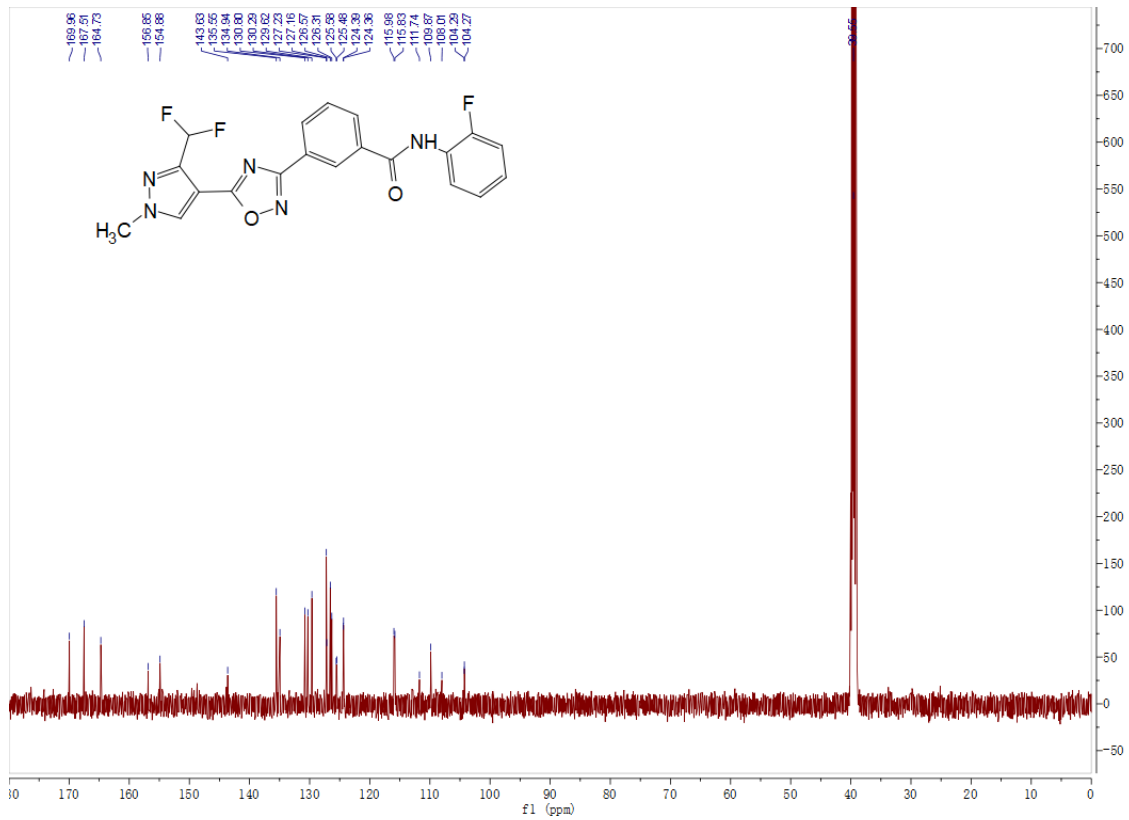

Figure S25 <sup>13</sup>C NMR spectra of 12g

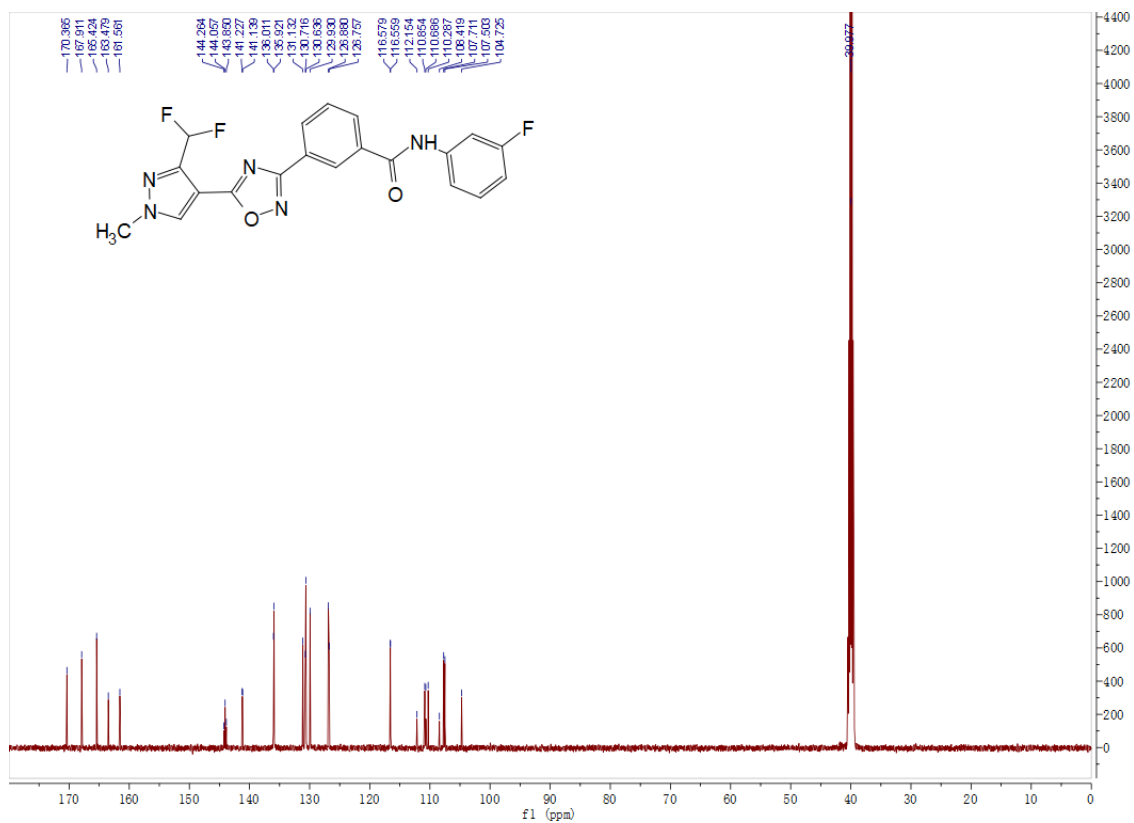

Figure S26 <sup>13</sup>C NMR spectra of 12h

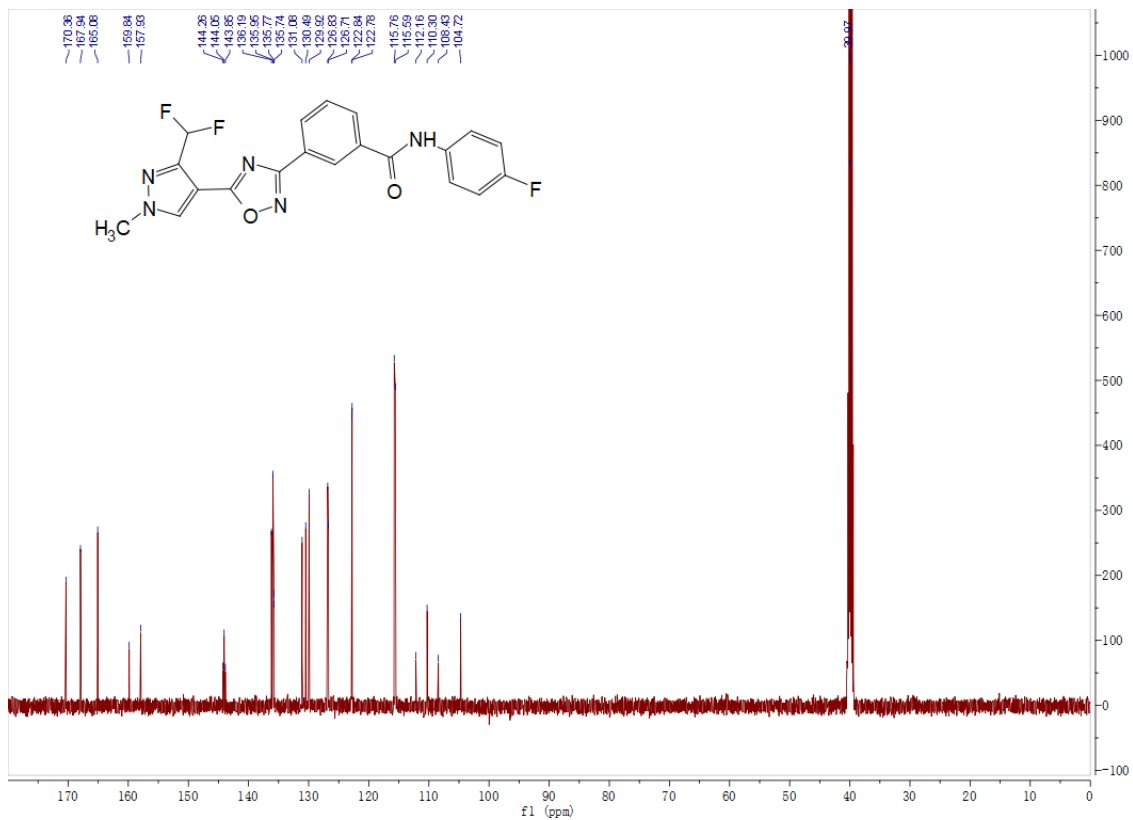

Figure S27 <sup>13</sup>C NMR spectra of 12i

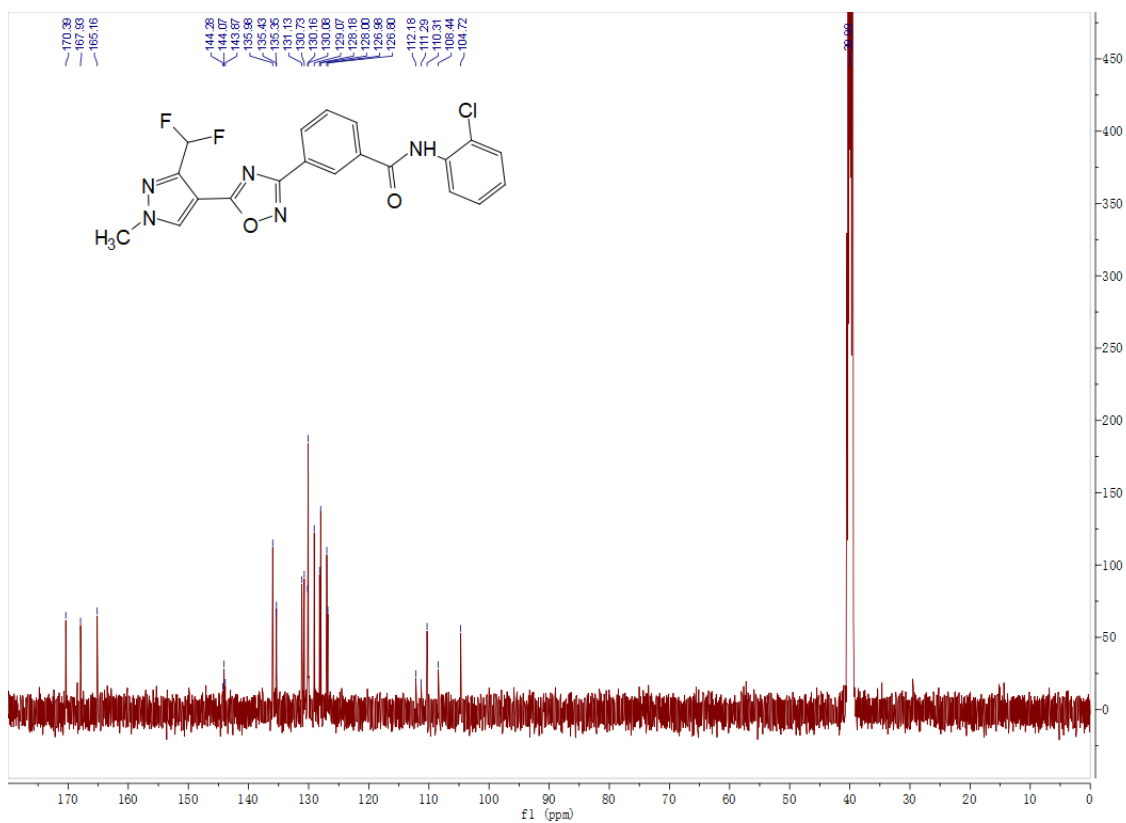

Figure S28 <sup>13</sup>C NMR spectra of 12j

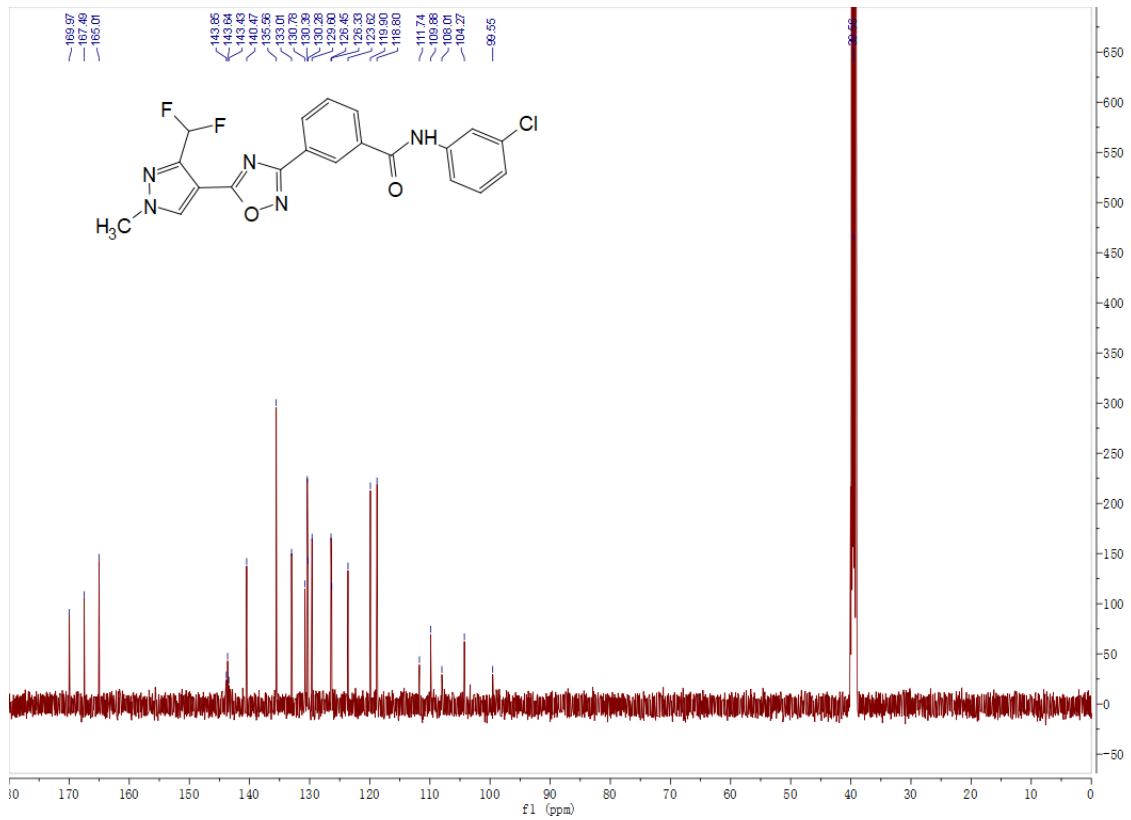

Figure S29  $^{13}\text{C}$  NMR spectra of 12k

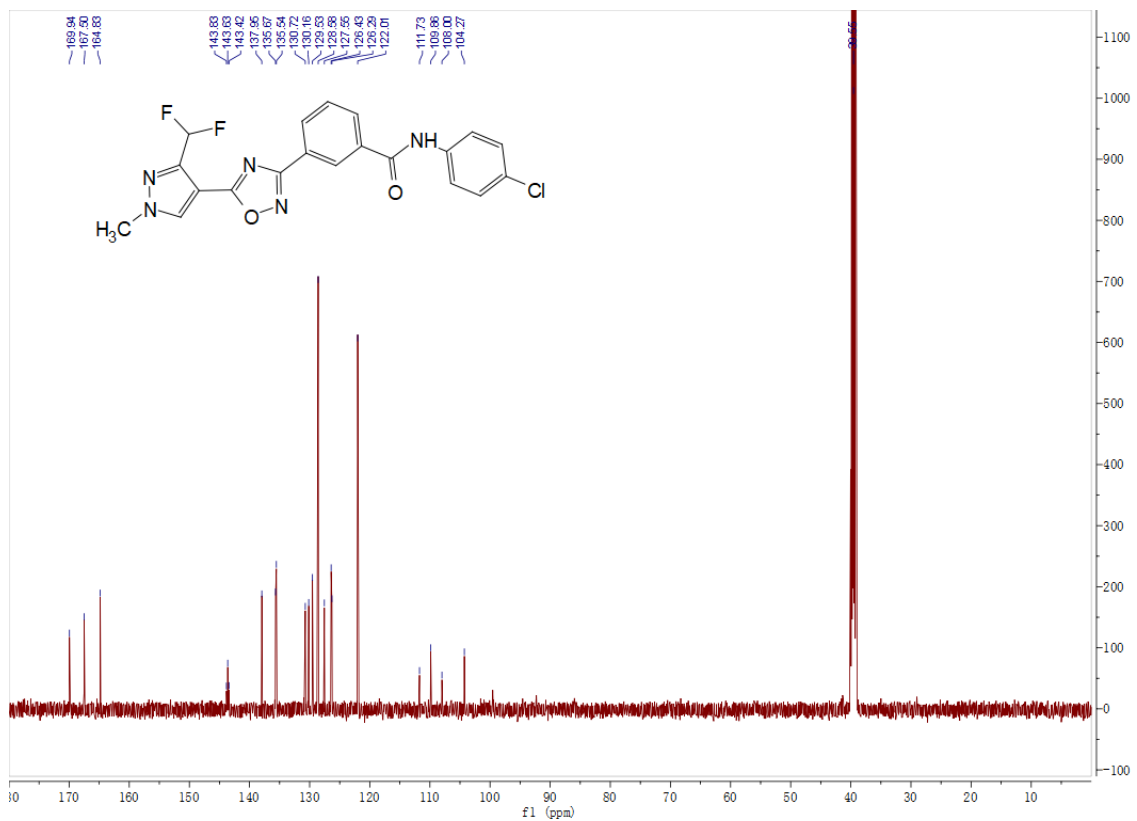

Figure S30  $^{13}\text{C}$  NMR spectra of 12l



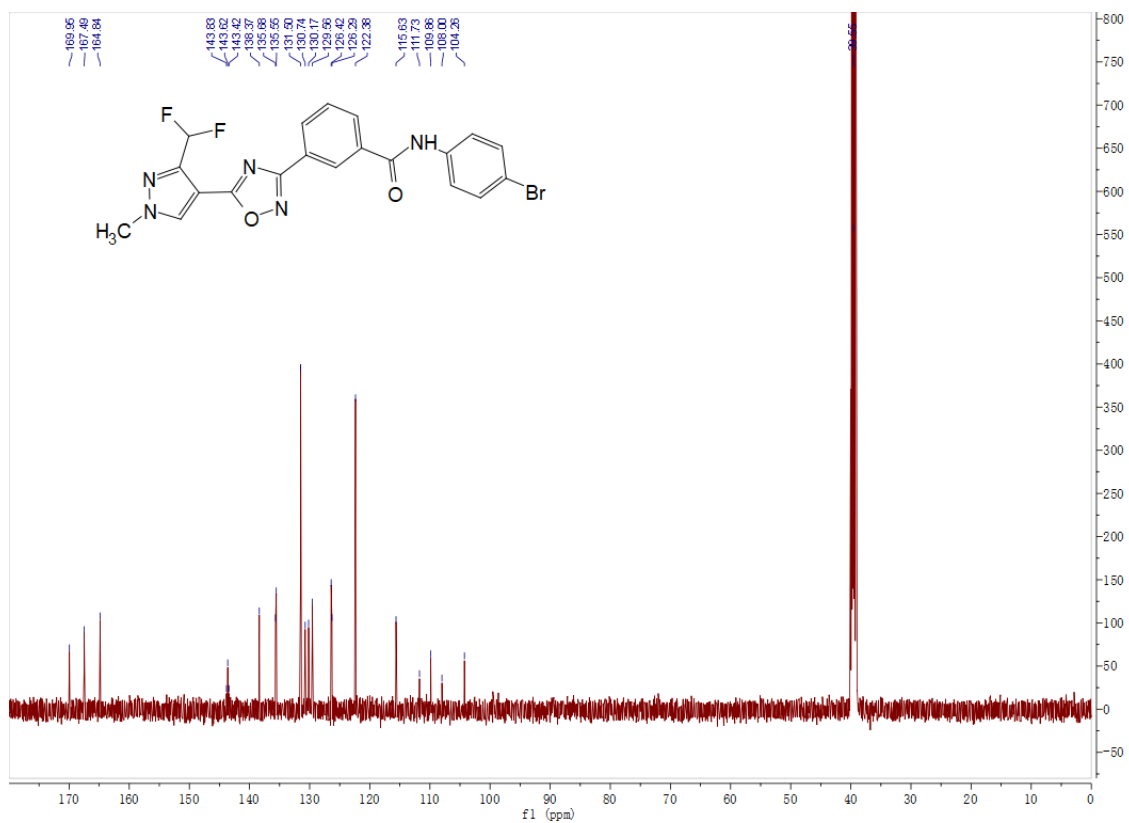

Figure S31 <sup>13</sup>C NMR spectra of 12m

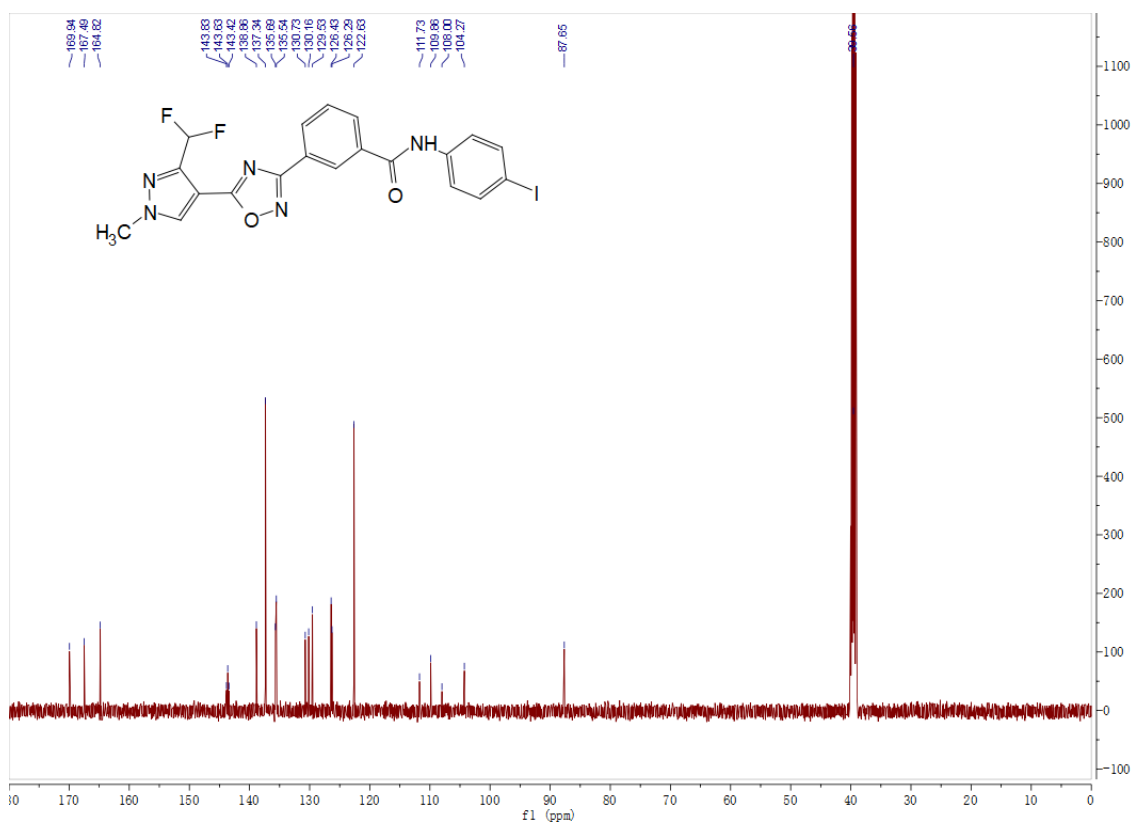

Figure S32 <sup>13</sup>C NMR spectra of 12n

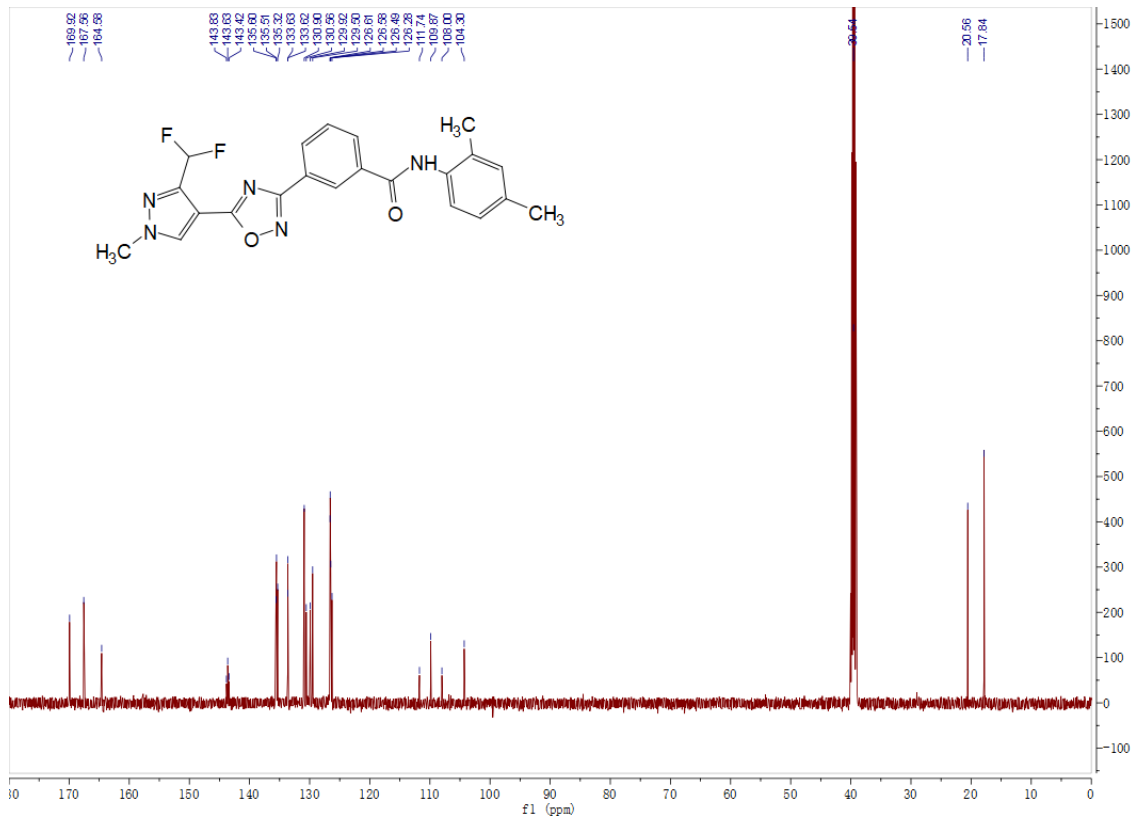

Figure S33 <sup>13</sup>C NMR spectra of 12o

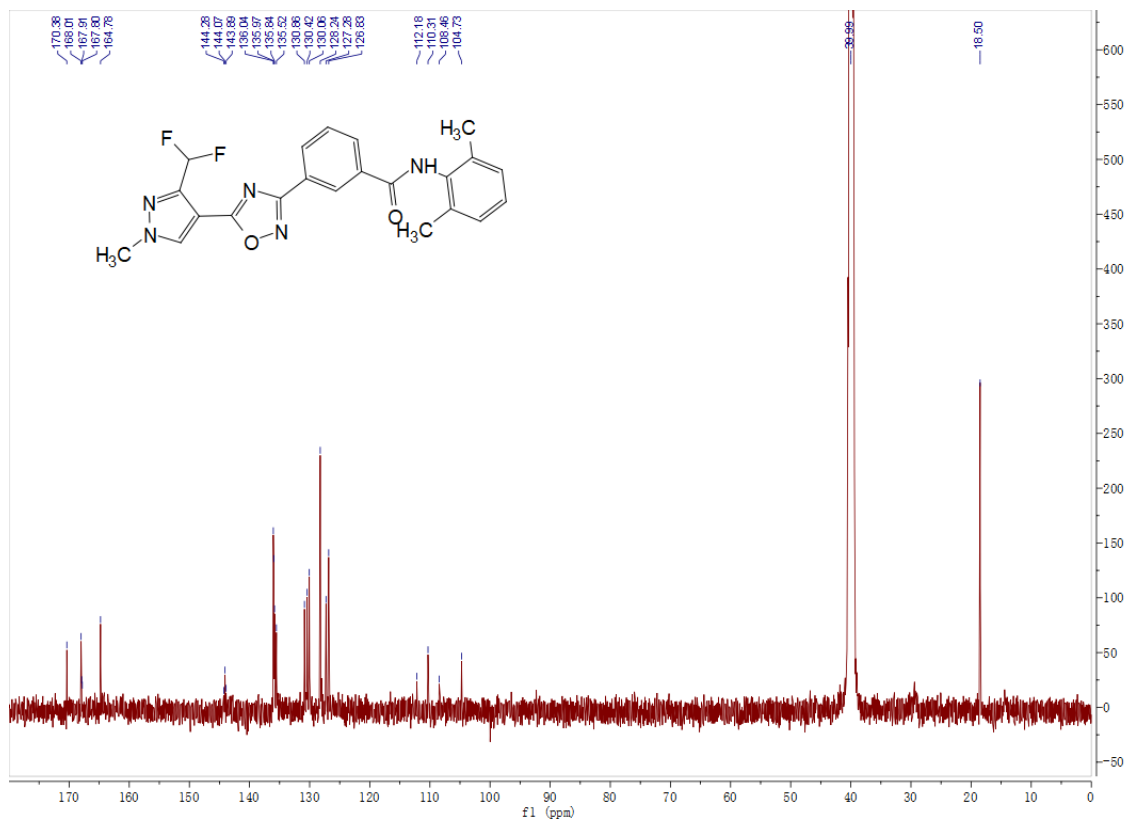

Figure S34 <sup>13</sup>C NMR spectra of 12p

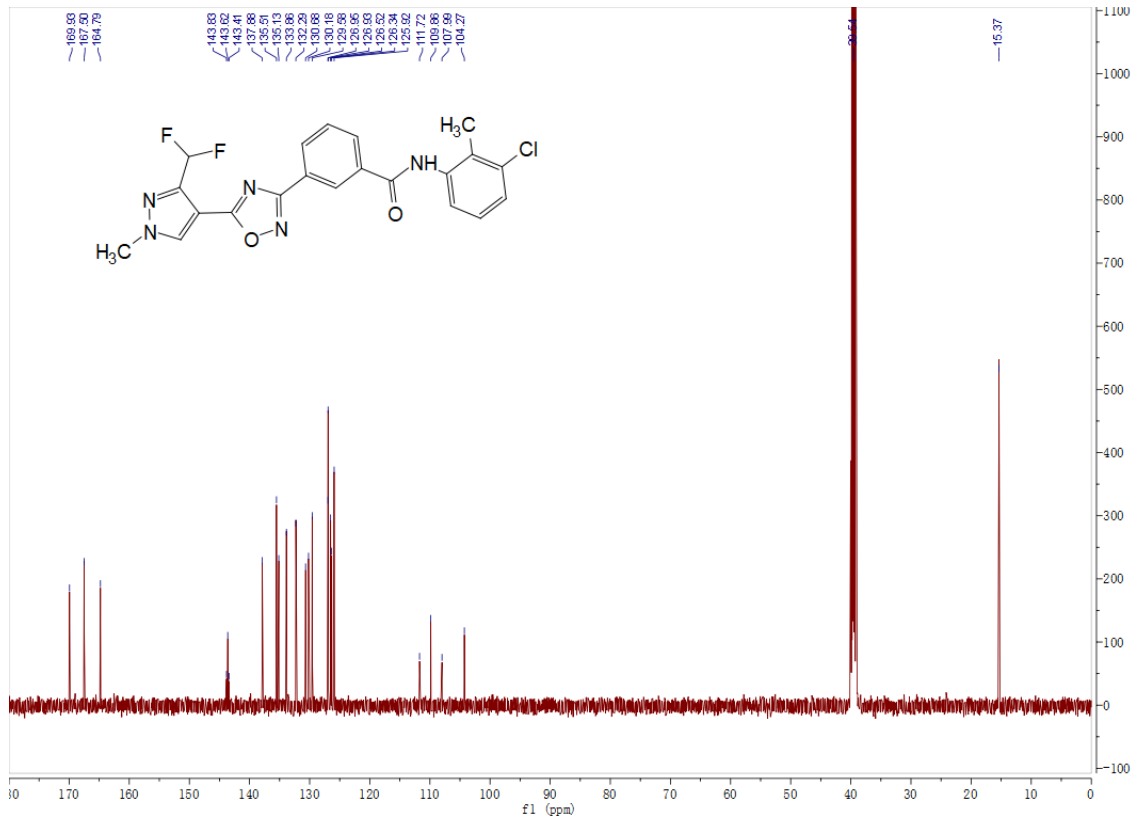

Figure S35  $^{13}\text{C}$  NMR spectra of 12q

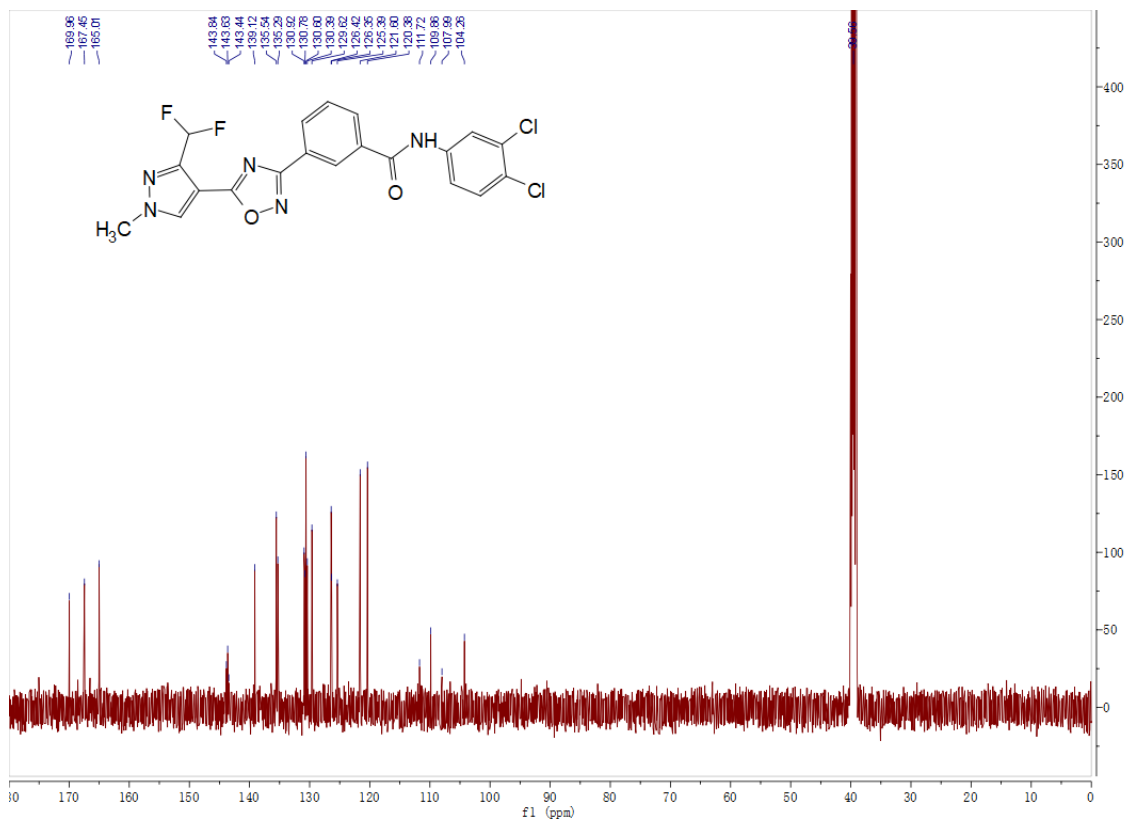

Figure S36  $^{13}\text{C}$  NMR spectra of 12r

### 3. ESI-HRMS spectra of 12a~12r

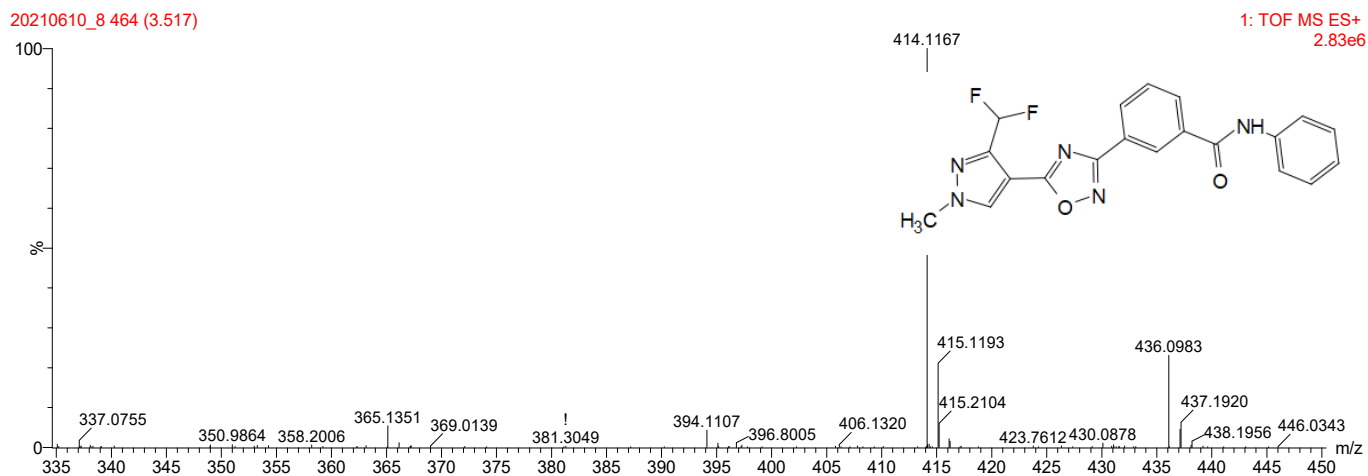

Figure S37 ESI-HRMS spectra of 12a

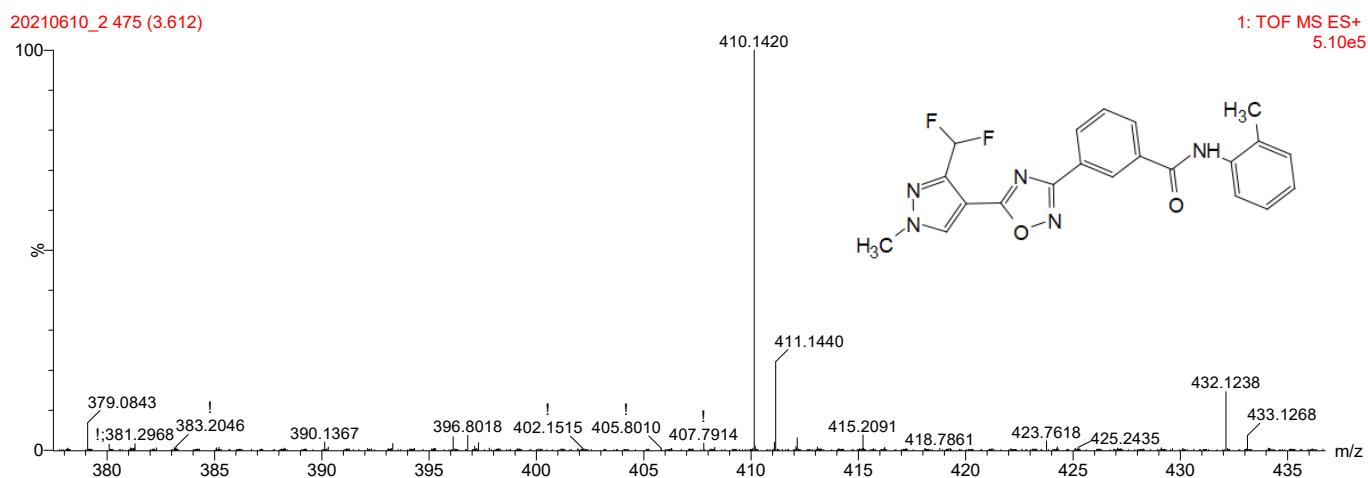

Figure S38 ESI-HRMS spectra of 12b

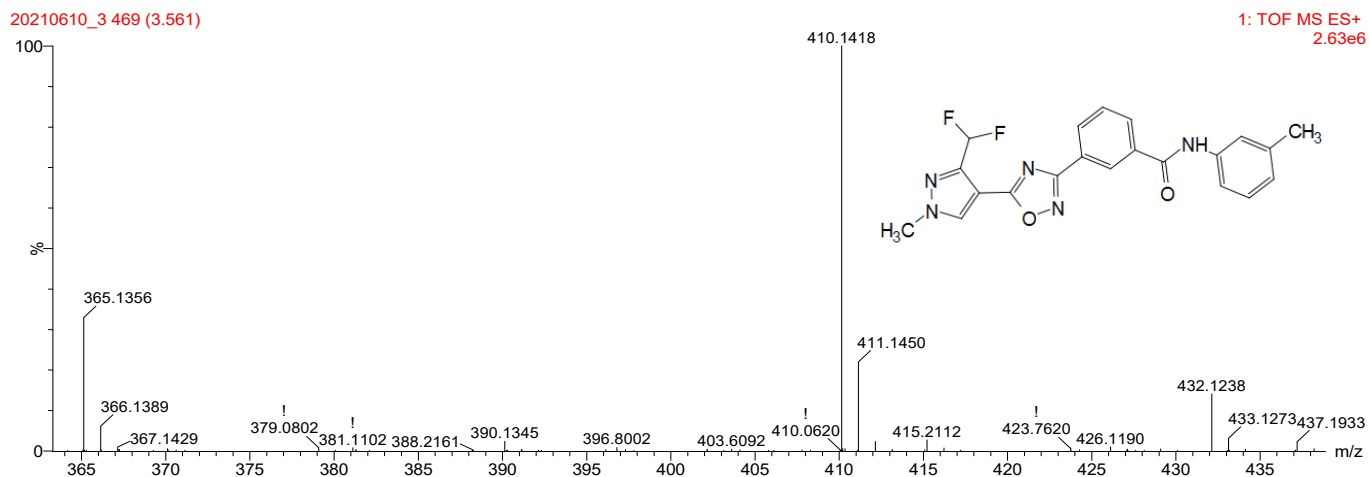

Figure S39 ESI-HRMS spectra of 12c

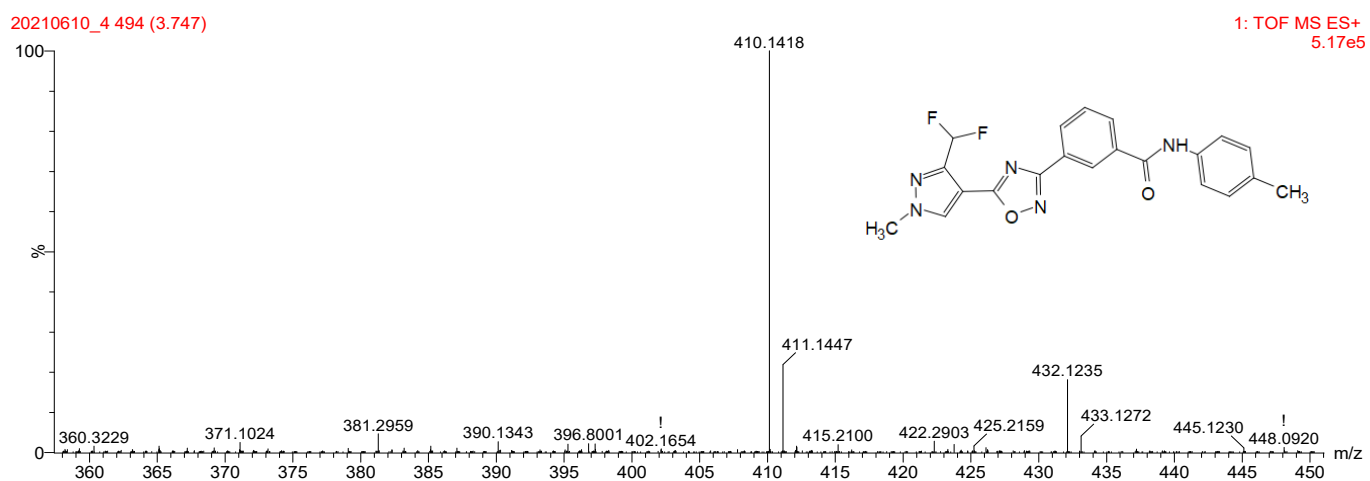

Figure S40 ESI-HRMS spectra of 12d

20210610\_5 490 (3.721)

1: TOF MS ES+  
1.95e6

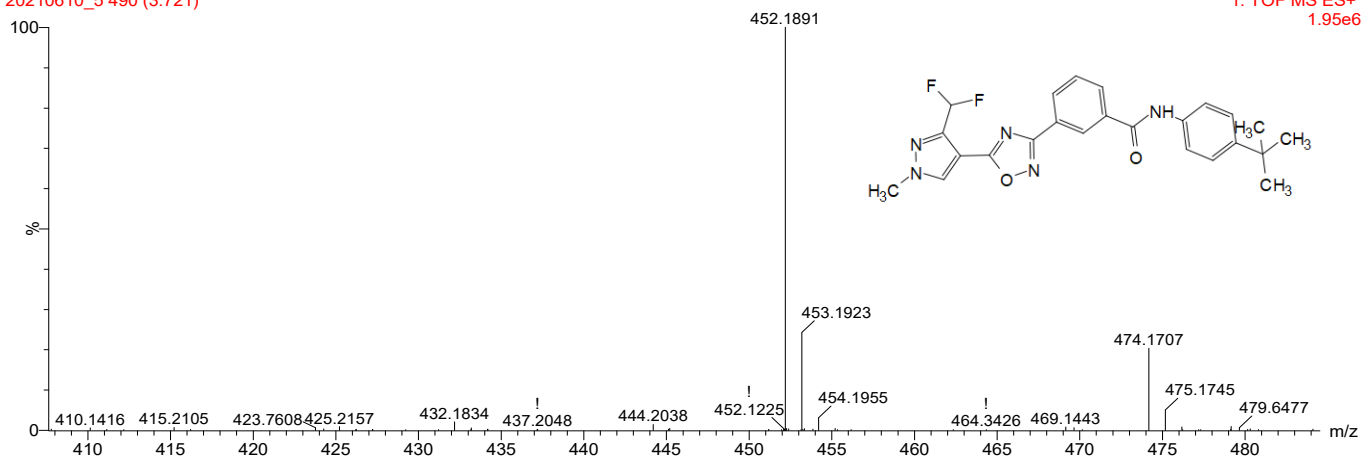

Figure S41 ESI-HRMS spectra of 12e

20210610\_6 486 (3.688)

1: TOF MS ES+  
9.13e5

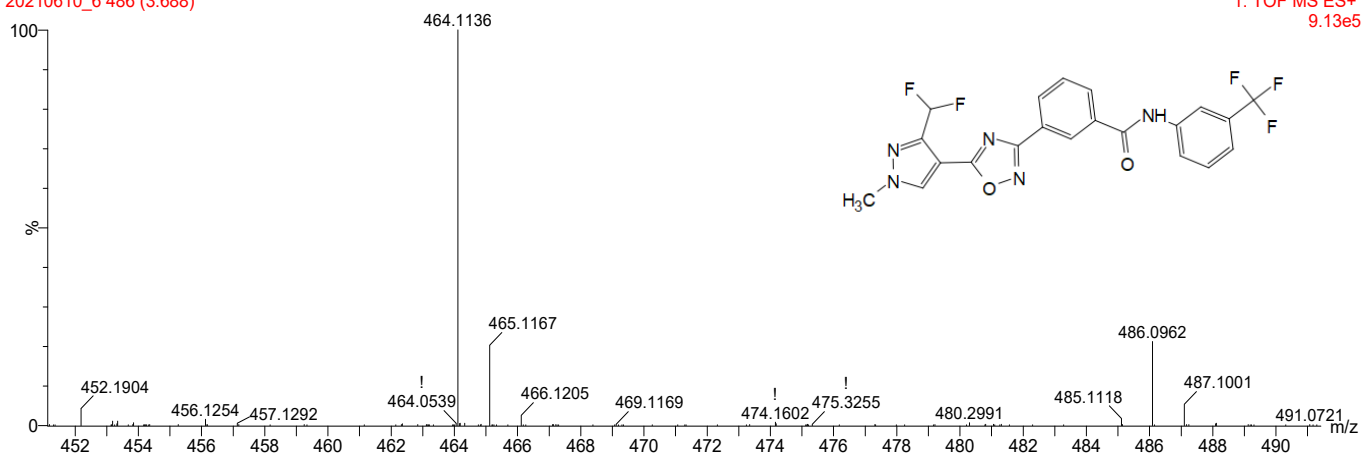

Figure S42 ESI-HRMS spectra of 12f

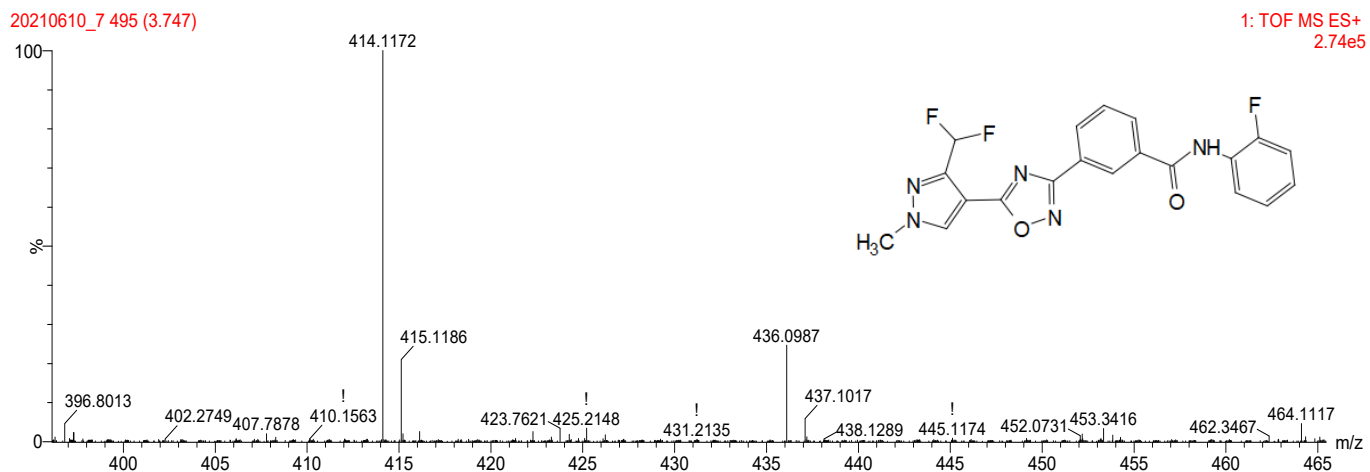

Figure S43 ESI-HRMS spectra of 12g

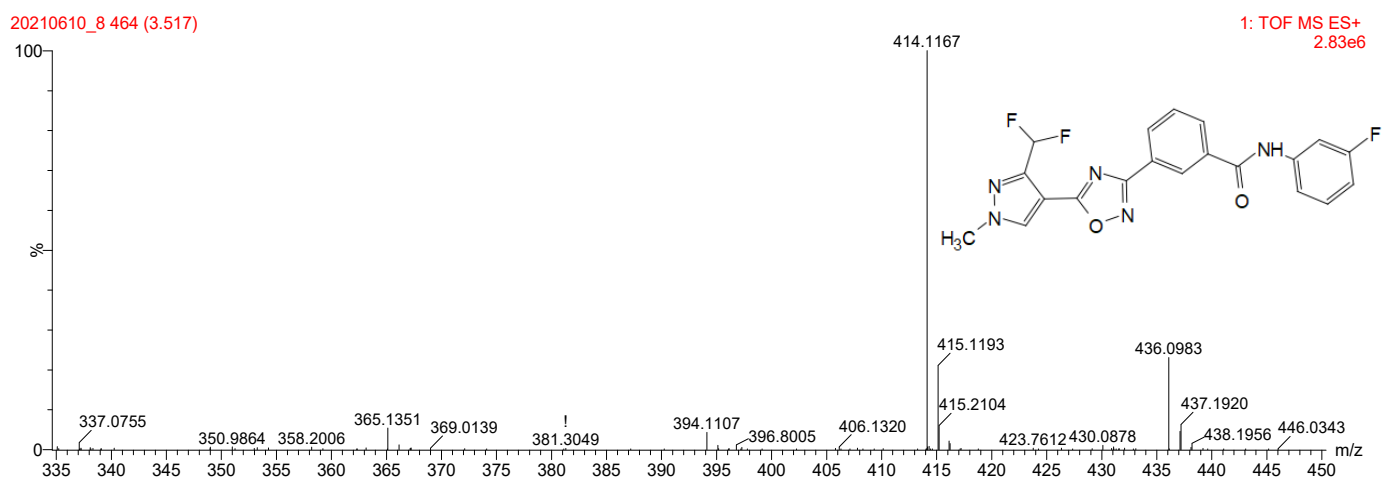

Figure S44 ESI-HRMS spectra of 12h

20210610\_9 487 (3.689)

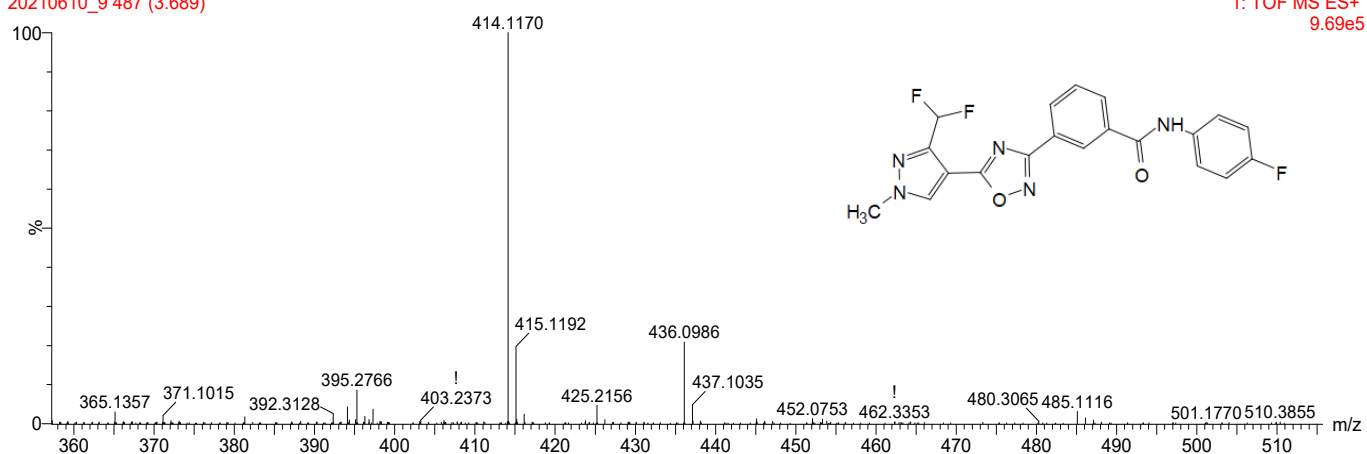

Figure S45 ESI-HRMS spectra of 12i

20210610\_10 457 (3.448)

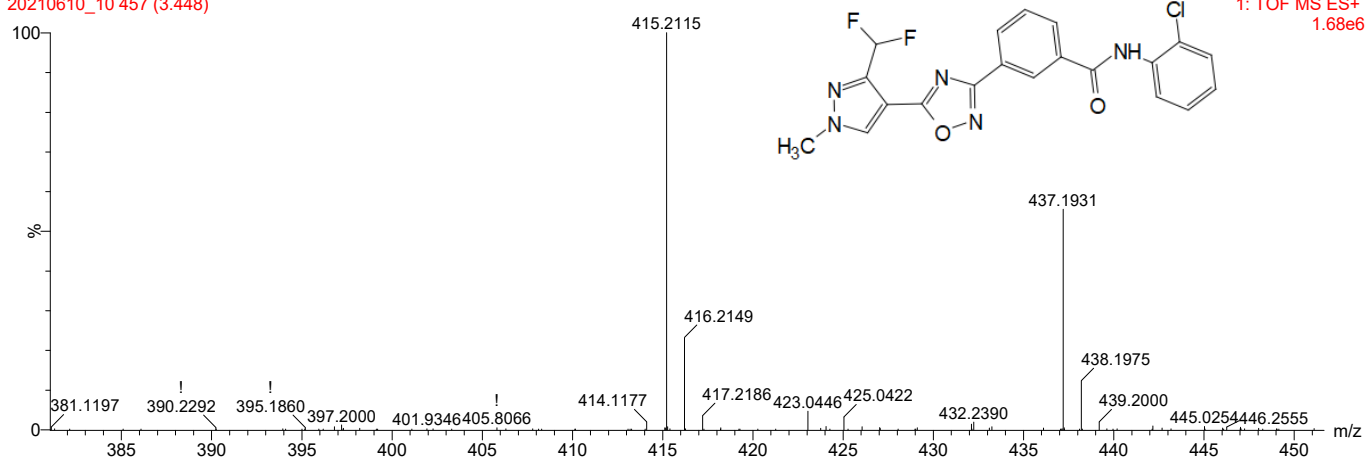

Figure S46 ESI-HRMS spectra of 12j



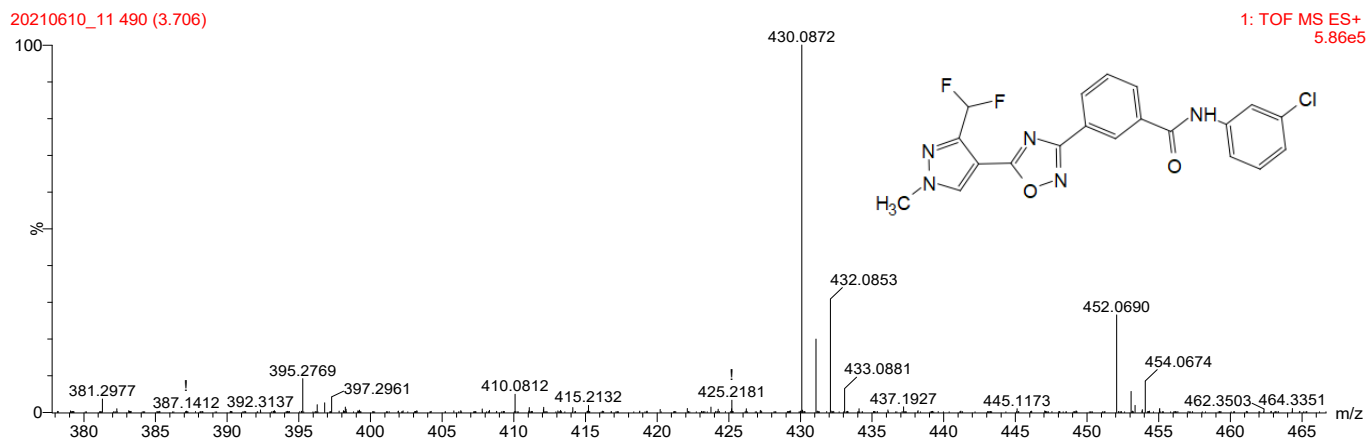

Figure S47 ESI-HRMS spectra of 12k

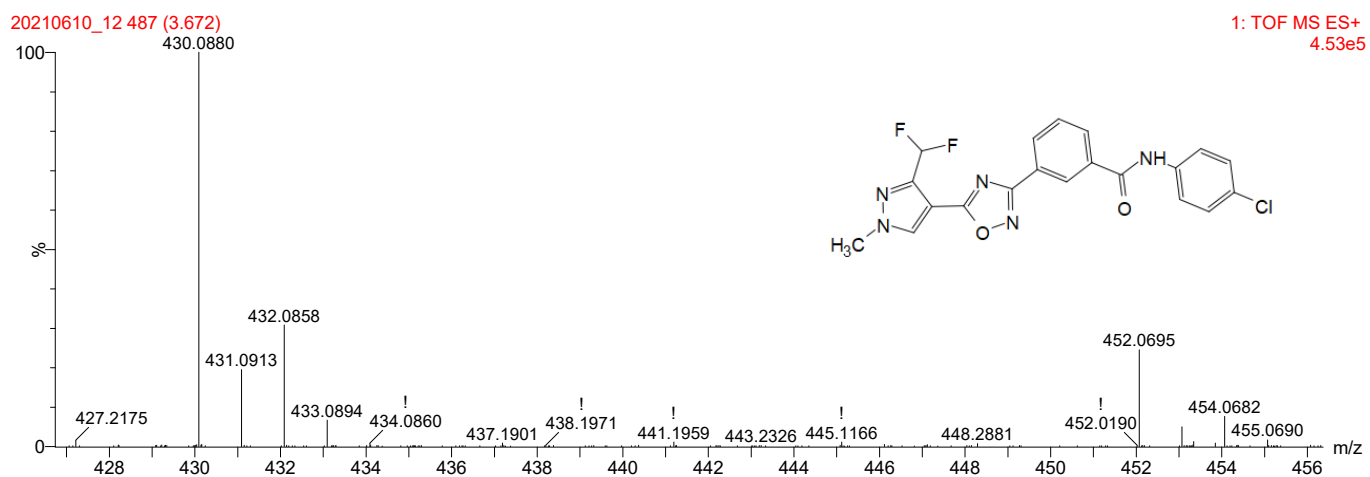

Figure S48 ESI-HRMS spectra of 12l

20210610\_13 475 (3.586)

1: TOF MS ES+  
5.82e5

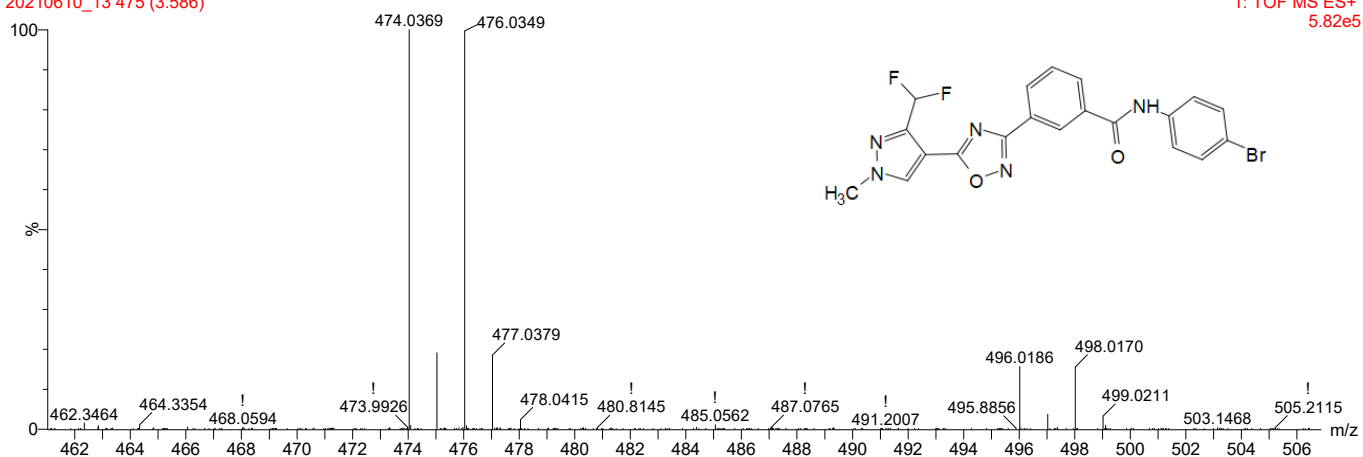

Figure S49 ESI-HRMS spectra of 12m

20210610\_14 481 (3.615)

1: TOF MS ES+  
9.21e5

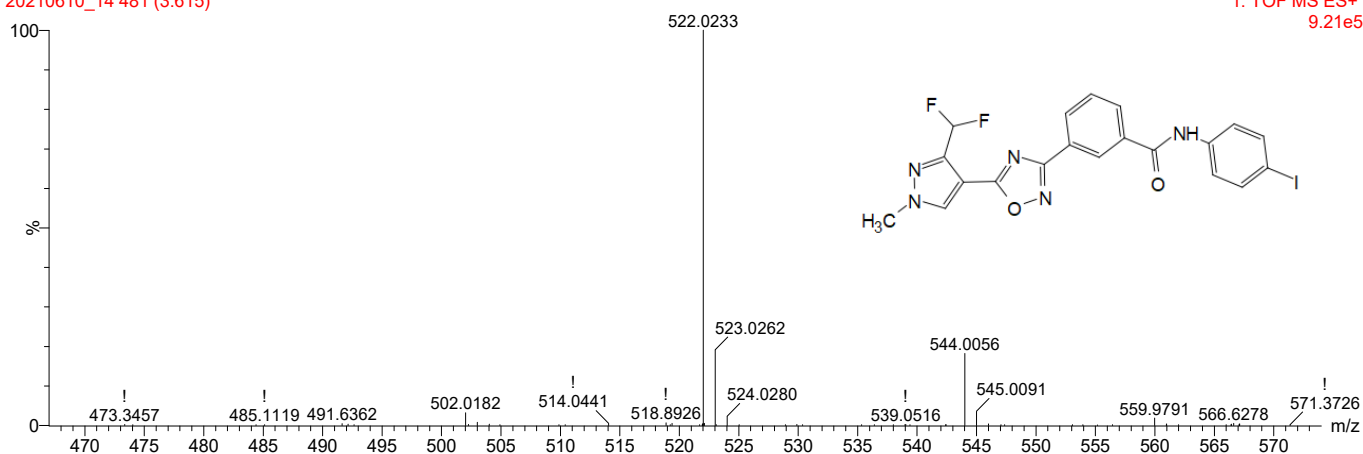

Figure S50 ESI-HRMS spectra of 12n

20210610\_15 466 (3.519)

1: TOF MS ES+  
1.49e6

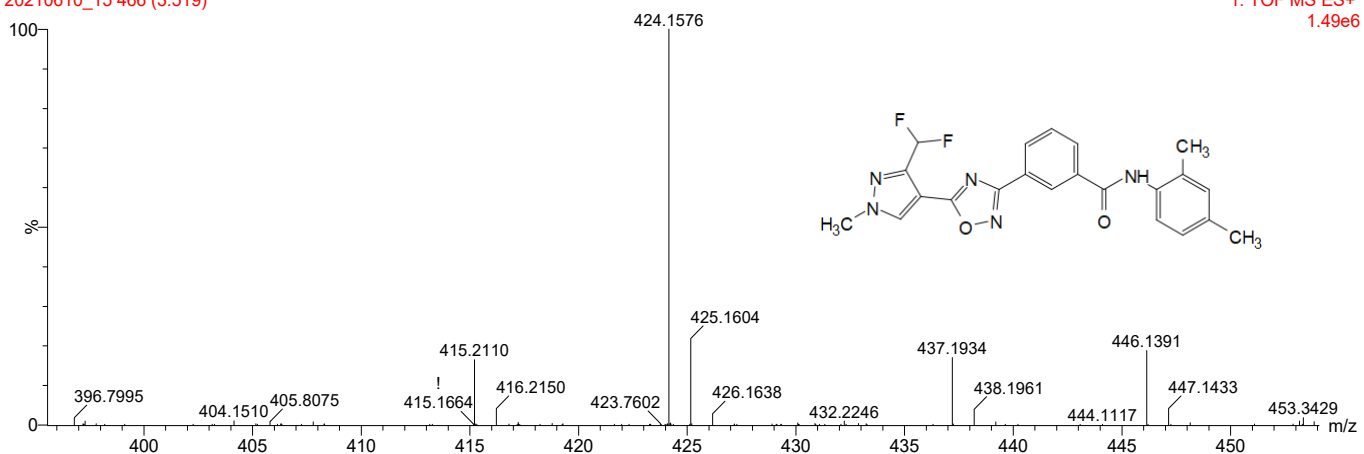

Figure S51 ESI-HRMS spectra of 12o

20210610\_16 473 (3.576)

1: TOF MS ES+  
6.50e5

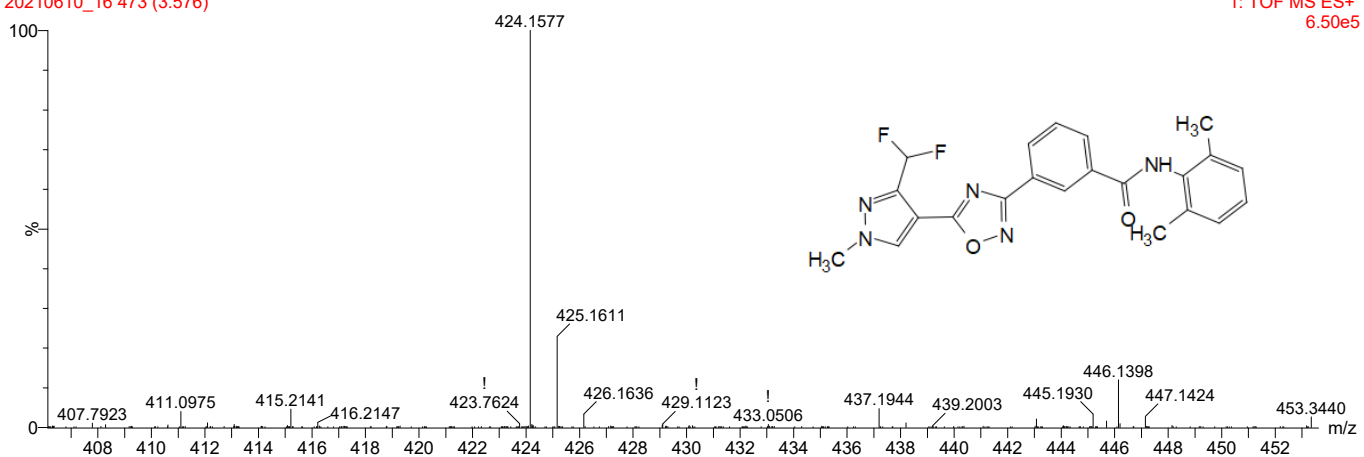

Figure S52 ESI-HRMS spectra of 12p

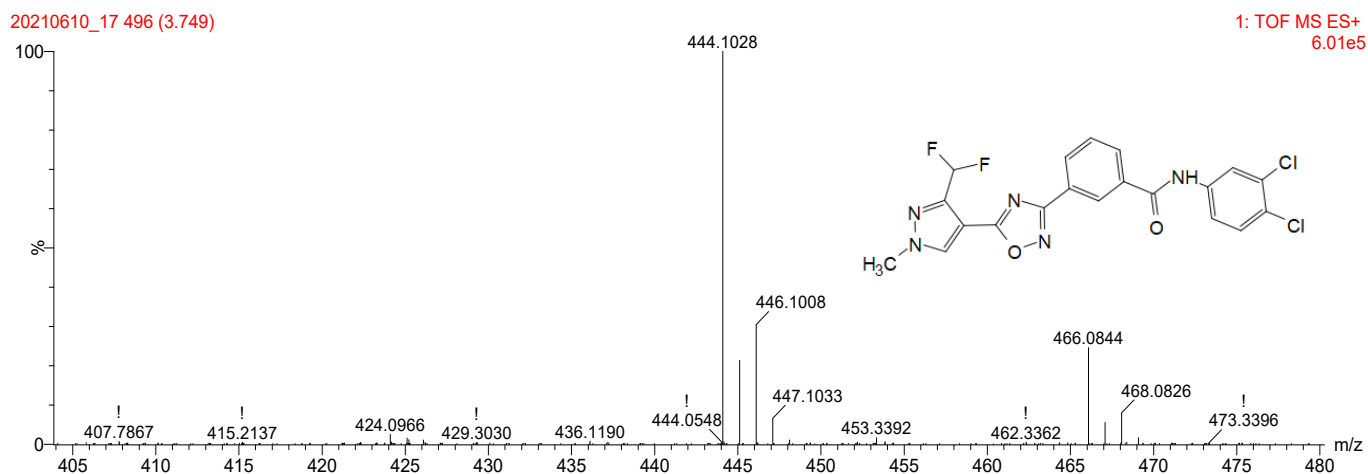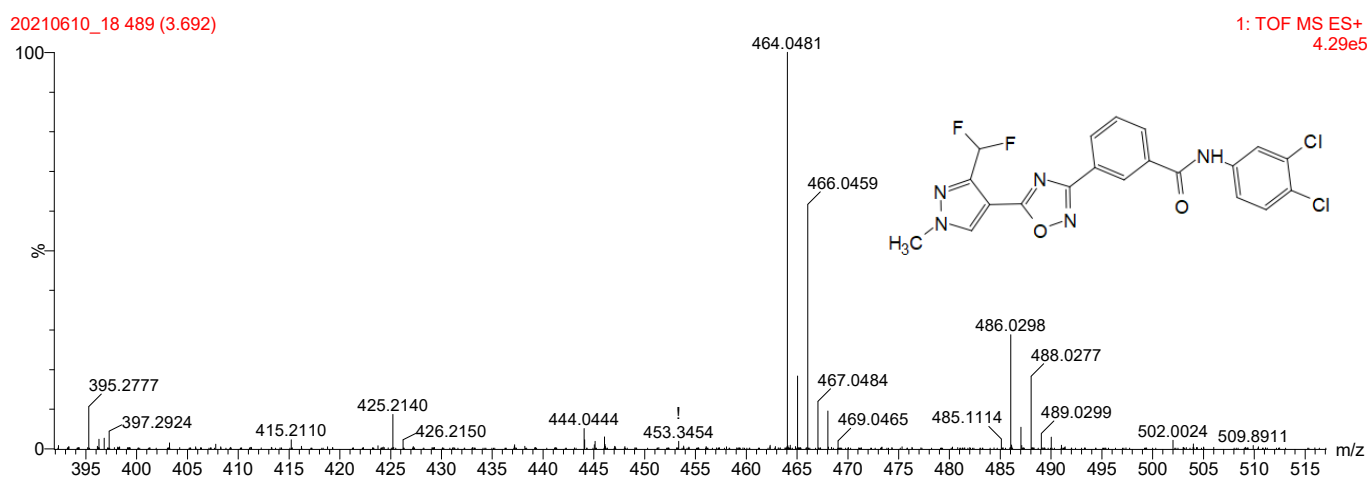

## 4. Biological activity and toxicity assays

### Fungicide Bioassay

**Insecticidal activities against *Mythimna sepatara*, *Pyrausta nubilalis* and *Helicoverpa armigera*.** Tested compounds were dissolved in N,N-dimethylformamide (DMF), and diluted to the required concentration (500 mg/L) with distilled water containing TW-80 (1%). A leaf discs of approximately 2 cm diameter cut from corn leaf was dipped in the test solution for 10 seconds. The dipped leaf discs were took out, dry naturally, and then place them in a petri dish with absorbent paper. Each petri dish infected with 10 the third stage larvae of *Mythimna sepatara* (*Pyrausta nubilalis* and *Helicoverpa armigera*), and the inoculated petri dishes were incubated at 27 °C for 48h. Mortality was assessed after 48 h. Etoxazole, broflanilide were used as positive controls, and a solution of equal DMF and TW-80 concentration was used as a negative control agent (CK). For each treatment, three replicates were conducted.

**Insecticidal activities against *Spodoptera frugiperda*.** Tested compounds were dissolved in N,N-dimethylformamide (DMF), and diluted to the required concentration (500 mg/L) with distilled water containing TW-80 (1%). A leaf discs of approximately 4 cm diameter cut

from corn leaf was dipped in the test solution for 10 seconds. The dipped leaf discs were taken out, dried naturally, and then placed in a petri dish. Each petri dish was infected with 10 second-stage larvae of *Spodoptera frugiperda* (starvation for 4 h), and the inoculated petri dishes were incubated at  $25 \pm 5$  °C for 72 h. Mortality was assessed after 72 h. Etoxazole, broflanilide were used as positive controls, and a solution of equal DMF and TW-80 concentration was used as a negative control agent (CK). For each treatment, four replicates were conducted.

**Larvicidal Activity against Mosquito (*Culex pipiens pallens*).** Tested compounds were dissolved in N,N-dimethylformamide (DMF), and diluted to the required concentration (10, 5 and 2 mg/L) with distilled water containing TW-80 (1%). Then 10 second-instar mosquito larvae were put into 10 mL of the test solution and raised for 72h. Mortality was measured after 72 h. Etoxazole was used as a positive control, and a solution of equal DMF and TW-80 concentration was used as a negative control agent (CK). Each treatment was performed three times.

### Antifungal Bioassay

Antifungal activities assay in vitro: The tested compounds were screened in vitro for their antifungal activities against nine phytopathogenic fungi by the mycelial growth inhibitory rate method. Nine phytopathogenic fungi such as *Alternaria solani* (AS), *Fusarium graminearum* (FG), *Cercospora arachidicola* (CA), *Pyricularia oryzae* (PO), *Sclerotinia sclerotiorum* (SS), *Botrytis cinerea* (BC), *Thanatephorus cucumeris* (TC), *Fusarium oxysporum* (FO), *Physalospora piricola* (PP) were used for the assays. Potato dextrose agar (PDA) medium was prepared in the flasks and sterilized. All tested compounds were dissolved in dimethyl sulfoxide (DMSO) before mixing with PDA, and the concentration of test compounds in the medium was fixed at 50 µg/mL. Subsequently, 50% effective concentration (EC<sub>50</sub>) values of some selected compounds were further calculated. The medium was then poured into sterilized petri dishes. All types of fungi were incubated in PDA at 27 °C for 5 days to get new mycelium for the antifungal assays, and a mycelia disk of approximately 4 mm diameter cut from culture medium was picked up with a sterilized inoculation needle and inoculated in the center of the PDA petri dishes. The inoculated Petri dishes were incubated at 27 °C for 48-72h. DMSO without any compounds mixed with PDA was served as a control, while bixafen, a commercial agricultural fungicide, was used as a positive control. For each treatment, three replicates were conducted. The radial growths of the fungal colonies were measured, and the data were statistically analyzed. The inhibitory effects of the test compounds on these fungi in vitro were calculated by the formula:

$$\text{Inhibition rate (\%)} = (C - T) \times 100 / (C - 4 \text{ mm})$$

Where C represents the diameter of fungi growth on untreated PDA, and T represents the diameter of fungi on treated PDA.

Finally, the linear regressions of inhibition rates (%) versus seven concentrations of some selected compounds and bixafen were obtained, and the EC<sub>50</sub> values were calculated. Statistical analysis was processed by the DPS v16.05 (Data Processing System) software.

### Zebrafish (*Danio rerio*) Toxicity Bioassay

AB strain of zebrafish (*Danio rerio*) acquired from China Zebrafish Resource Center (CZRC), was used in this study. Before the spawning, adult zebrafish (two female and three males) were kept separately in a spawning box overnight, and the isolation boards were removed when the light was switched on. Embryos were collected within 30 min. The fertilized and normal embryos were inspected and staged for subsequent experiments under a stereomicroscope. All tested compounds were dissolved in DMSO, and the concentration of test compounds was fixed at 2 mg/L. At 6 hpf, these embryos were distributed into 6-well plates (one embryo per well) for exposure to the tested compounds solution as described above. All exposure solutions were renewed every 24 h, and dead embryos were immediately removed. After continuous exposure for 5 d, statistical related experimental data were recorded every 24 h, and images were taken with a digital camera. Each treatment included three biological replicates.
